# Supplementary material for: Gaps between fruit and vegetable production, demand, and recommended consumption at global and national levels: an integrated modelling study
Source: PubMed Central journal article supplement (PMC6637854; doi:10.1016/s2542-5196(19)30095-6), 2019-07
Supplement: mmc1.pdf [file mmc1.pdf]

# THE LANCET

## Planetary Health

### **Supplementary appendix**

This appendix formed part of the original submission and has been peer reviewed. We post it as supplied by the authors.

Supplement to: Mason-D'Croz D, Bogard JR, Sulser TB, et al. Gaps between fruit and vegetable production, demand, and recommended consumption at global and national levels: an integrated modelling study. *Lancet Planet Health* 2019; **3**: 318–29.

# Gaps between fruit and vegetable production, demand, and recommended consumption at global and national levels: An integrated modelling study

Supplementary Materials

Authors: Daniel Mason-D’Croz, Jessica R. Bogard, Timothy B. Sulser, Nicola Cenacchi, Shahnila Dunston, Mario Herrero, Keith Wiebe

---

## Table of Contents

|                                                                                                           |    |
|-----------------------------------------------------------------------------------------------------------|----|
| National and International Dietary Guidelines and Recommendations relating to Fruits and Vegetables ..... | 1  |
| IMPACT Model Description and Relevant Commodity and Regional Definitions .....                            | 2  |
| Crop Production .....                                                                                     | 2  |
| Livestock Production .....                                                                                | 4  |
| Production of Processed Goods .....                                                                       | 5  |
| Commodity Demand .....                                                                                    | 6  |
| Markets, Trade, and Equilibrium Prices .....                                                              | 8  |
| Fruit and Vegetable Commodities in IMPACT .....                                                           | 10 |
| IMPACT Regional Definitions .....                                                                         | 10 |
| Applying Food Waste in the Analysis .....                                                                 | 16 |
| Scenario Assumptions .....                                                                                | 18 |
| Socioeconomic assumptions in the SSPs .....                                                               | 19 |
| Additional Scenario Assumptions .....                                                                     | 20 |
| Consumption preferences and sustainable diet .....                                                        | 20 |
| Agricultural productivity .....                                                                           | 20 |
| Land-Use Regulation .....                                                                                 | 20 |
| Trade .....                                                                                               | 20 |
| Joining NOURISHING Framework and Nuffield Ladder .....                                                    | 24 |
| References .....                                                                                          | 26 |

## Figures

|                                                                                                                                                                                                                       |    |
|-----------------------------------------------------------------------------------------------------------------------------------------------------------------------------------------------------------------------|----|
| FIGURE S1 REPRESENTATION OF FOOD LOSSES AND WASTE IN IMPACT .....                                                                                                                                                     | 16 |
| FIGURE S2 RATIO OF PER CAPITA FRUIT & VEGETABLE AVAILABILITY TO WHO MINIMUM CONSUMPTION LEVEL (400 G/PERSON/DAY) UNDER DIFFERENT WASTE ASSUMPTIONS BY 2050 UNDER SSP2 .....                                           | 17 |
| FIGURE S3 COMPARING THE RATIO OF FRUIT & VEGETABLE AVAILABILITY TO WHO MINIMUM RECOMMENDATION BY 2050 FOR SSP 1–3 UNDER DIFFERENT EXOGENOUS ASSUMPTIONS (DEFAULT AND SUSTAINABLE) ON FUTURE DIETARY TRANSITIONS ..... | 21 |
| FIGURE S4 ALL CCOUNTRY RATIOS OF FRUIT & VEGETABLE AVAILABILITY TO WHO AGE-SPECIFIC RECOMMENDATIONS .....                                                                                                             | 22 |
| FIGURE S5 ALL CCOUNTRY RATIOS OF FRUIT & VEGETABLE AVAILABILITY TO WHO MINIMUM RECOMMENDATION (400 G/PERSON/DAY) .....                                                                                                | 23 |

## Tables

|                                                                                                                   |    |
|-------------------------------------------------------------------------------------------------------------------|----|
| TABLE S1 SUMMARY OF SELECTED NATIONAL AND INTERNATIONAL DIETARY GUIDELINES RELATING TO FRUIT AND VEGETABLES ..... | 1  |
| TABLE S2 FRUIT AND VEGETABLE COMMODITIES IN IMPACT AND EQUIVALENT COMMODITIES IN FAOSTAT ..                       | 10 |
| TABLE S3 IMPACT COUNTRIES AND REGIONAL DEFINITIONS .....                                                          | 10 |
| TABLE S4 FAO REGIONAL FRUIT AND VEGETABLE WASTE ESTIMATES APPLIED TO IMPACT REGIONS .....                         | 16 |
| TABLE S5 SUMMARY OF SSP SCENARIO SPACE AND SCENARIO NARRATIVES .....                                              | 18 |
| TABLE S6 SUMMARY OF SOCIOECONOMIC ASSUMPTIONS OF POPULATION, GDP, AND PER CAPITA GDP FOR SSP 1–3 .....            | 19 |
| TABLE S7 MAPPING THE NOURISHING FRAMEWORK TO THE NUFFIELD LADDER .....                                            | 25 |

## National and International Dietary Guidelines and Recommendations relating to Fruits and Vegetables

Fruits and vegetables play a key role in promoting human health not only in their relative nutrient density, but also as important sources of fiber and other compounds associated with promoting healthier gut-biomes, strengthening the immune system, and reducing the risk of non-communicable diseases.<sup>1</sup> The recognition of the importance of eating fruits and vegetables and their “protective” role in a healthy diet is not new. The first formal dietary recommendation, issued in the United Kingdom in 1835, recognized the importance of citrus fruit to avoid scurvy and preceded the development of more complete dietary recommendations for energy and nutrient intake by more than a century.<sup>2</sup>

Today 87 countries have developed food-based dietary guidelines, in which almost all promote fruit and vegetable consumption, albeit with different definitions of what constitutes a fruit or vegetable, and varying recommended consumption levels.<sup>3</sup> WHO recommendations are consistent with national guidelines based on detailed health modelling. Table S1 highlights the similarity of national guidelines with the WHO recommendations.

**Table S1 Summary of selected national and international dietary guidelines relating to fruit and vegetables**

| FAO Region                      | Country                     | Age group (years)        | Servings Equivalent in grams |         |          |
|---------------------------------|-----------------------------|--------------------------|------------------------------|---------|----------|
|                                 |                             |                          | Vegetables                   | Fruits  | Total    |
| Africa and Middle East          | Benin <sup>4</sup>          | Adults and Children (2+) | 100–750                      | 75–450  | 175–1200 |
|                                 | Lebanon <sup>5</sup>        | Adults and Children (2+) | 250–450                      | 300     | 550–750  |
|                                 | South Africa <sup>6</sup>   | Adults and Children (4+) |                              |         | 320–400  |
| Asia and Pacific                | Australia <sup>7</sup>      | Adults and Children (2+) | 188–450                      | 150–300 | 338–750  |
|                                 | China <sup>8</sup>          | Adults and Children (2+) | 300–500                      | 200–350 | 500–850  |
|                                 | India <sup>9</sup>          | Adults and Children (1+) | 100–500                      | 100     | 208–720  |
|                                 | Thailand <sup>10</sup>      | Adults and Children (2+) | 160–240                      | 450–750 | 610–990  |
| Europe and North America        | Canada <sup>11</sup>        | Adults and Children (2+) |                              |         | 400–1500 |
|                                 | Spain <sup>12</sup>         | Adults and Children (2+) | 300                          | 360     | 660      |
|                                 | United States <sup>13</sup> | Adults and Children (2+) | 250–450                      | 300     | 550–750  |
| Latin America And the Caribbean | Argentina <sup>14</sup>     | Adults and Children (2+) | 400                          | 300     | 700      |
|                                 | Bolivia <sup>15</sup>       | Adults and Children (6+) | 100–600                      | 200–400 | 300–1000 |
|                                 | Mexico <sup>16</sup>        | Adults and Children (2+) | 150–600                      | 100–600 | 250–1200 |
| International Recommendations   | WHO <sup>17,18</sup>        | Minimum Recommendation   |                              |         | 400      |
|                                 |                             | Adults and Children      |                              |         | 330–600  |

| Color Legend: | Vegetables incl. starchy roots and pulses | Vegetables incl. starchy roots, pulses unspecified | Vegetables incl. starchy roots, excl. pulses | Vegetables excl. starchy roots and pulses |
|---------------|-------------------------------------------|----------------------------------------------------|----------------------------------------------|-------------------------------------------|
|---------------|-------------------------------------------|----------------------------------------------------|----------------------------------------------|-------------------------------------------|

Note: Where dietary guidelines didn't specify servings in grams, serving definitions were matched to Australia's dietary guidelines and estimated in grams

The WHO recommendations are also broadly consistent with the benchmark healthy diet presented in the Eat-Lancet commission study on healthy diets from sustainable food systems, falling within the range of healthy consumption levels (300-900 g/person/day). Globally the age-specific WHO recommendations would suggest global average fruit and vegetable availability around 560 g/person/day, quite similar to the median EAT-Lancet recommendation of 500 g/person/day of fruits and vegetables (300 g/person/day of vegetables and 200 g/person/day of fruits) for adults and children 2+ years of age.<sup>19</sup>

## IMPACT Model Description and Relevant Commodity and Regional Definitions

In this analysis we used the quantified scenarios from IMPACT from the latest round of work from the Agricultural Intercomparison and Improvement Project (AgMIP).<sup>20,21</sup> IMPACT is a global economic model that was developed at IFPRI in the 1990s to contribute to foresight efforts around the 2020 Vision initiative<sup>22</sup>, and to address a lack of foresight tools to inform policymakers and researchers on the policies that would be necessary to ensure global food security into the future. Over time this economic model has been continuously improved, linking the core economic model to biophysical models (climate, crop, hydrology, etc.), environmental, health, and a range of complimentary economic models.

At the core of this expanding integrated modelling system is a multi-market partial equilibrium model of the global agriculture sector. IMPACT simulates global production, trade, prices, and demand for 62 agricultural commodities in 158 countries and regions. The multi-market model simulates national and global agricultural markets, solving for equilibrium prices and quantities, such that global demand (including waste and losses) equals global supply. IMPACT simulates agricultural markets from 2005 to 2050, with the initial 10 years (2005-2015) serving as a calibration period to adjust to historical data.

The following description is drawn from the full model documentation<sup>23</sup> which is available at: <http://ebrary.ifpri.org/cdm/ref/collection/p15738coll2/id/129825>.

### Crop Production

Crop production in IMPACT is simulated through area<sup>1</sup> and yield response functions. The choice of specifying crop production in this way has a long history in IMPACT and facilitates interaction with commodity experts and land-use specialists, who work in natural units (hectares, tons per hectare). Crop production in IMPACT is specified sub-nationally with the area and yield functions at the level of FPUs. This regional disaggregation permits linking with water models and provides the added benefit of smaller geographical units for aggregating climate change results, which can vary significantly from one location to another. Land used for crop production is divided into irrigated and rainfed systems, capturing the significant differences in yields observed across these cultivation systems and linking directly with the water models, which treat irrigated and rainfed water supplies separately.

IMPACT uses a land market to manage competing demands for agricultural land from different crops, as well as providing new linkage points to land-use models that work with broader land-use changes, such as conversion of forest to grasslands and agricultural land. It also allows us to separate total area supply (irrigated and rainfed) from individual crop area demands and allows equilibrium conditions to determine the best economic use of the available land. The total supply of land is assumed to be a function of the scarcity value or shadow price index of land, which can also be considered a summary of changes in crop prices. The shadow price (WF) is indexed to 1 in the first year and changes based on changing demands from all crops for land area.

$$QFS_{fpu,Ind} = QFSInt_{fpu,Ind} \times QFSInt2_{fpu,Ind}$$

$QFS$  = Land supply

$QFSInt$  = Land supply intercept (base year supply)

$QFSInt2$  = Land supply growth multiplier

$fpu$  = Food production unit

$Ind$  = Land type (i.e. irrigated, rainfed)

The supply of land is considered exogenous within each year, meaning that farmers are not allowed to adjust the total crop area in the middle of the year. The total land supply over time is driven by exogenous trends on the availability of area for agriculture as well as endogenous responses to changes in area demand, which is handled in between years. The following equation is applied at the end of each year before solving for a new year.

---

<sup>1</sup> In IMPACT, area is treated as harvested area, which is the total area planted and harvested within a year, and may include multi-cropping or multiple harvests and differ from total arable land or reported physical area.

$$QFSInt2_{fpu,Ind,t+1} = QFSInt2_{fpu,Ind,t} \times \left(1 + Landgr_{fpu,Ind}\right) \times \left(\frac{WF_{fpu,Ind,t}}{\langle WF_{fpu,Ind,t} \rangle_{t-3}}\right)^{L\gamma}$$

$Landgr$  = Exogenous land supply growth rate

$\langle WF_{fpu,Ind,t} \rangle_{t-3}$  = Average shadow price of past 3 years

$L\gamma$  = Land supply elasticity

Crop area is specified as an area demand function with respect to changes in the marginal revenue product, changes in land cost, and exogenous non-price trends in harvested area. Crop area elasticities simulate the supply response to changes in the marginal revenue of land represented by the following equation as the interaction of the net price of an activity and the productivity of the activity in using an additional hectare of land.

$$MRP_{j,fpu,Ind} = Yld_{j,fpu,Ind} \times PNET_{j,cty}$$

$MRP$  = Marginal revenue product of land

$Yld$  = Crop yield

$PNET$  = Net price for the activity at the country-level mapped to fpu

$j$  = Activity (crop)

$cty$  = Country

The exogenous trend in harvested area captures changes in area resulting from factors other than direct market effects, such as government programs encouraging cropping expansion, contraction due to soil degradation, or conversion of land from agriculture to non-agricultural uses. The combination of these endogenous and exogenous factors in area demand are described in the following equation.

$$Area_{j,fpu,Ind} = Arealnt_{j,fpu,Ind} \times Arealnt2_{j,fpu,Ind} \times WF_{fpu,Ind}^{WF\epsilon} \times \left(\frac{MRP_{j,fpu}}{MRP0_{j,fpu}}\right)^{A\epsilon}$$

$Area$  = Final crop area

$Arealnt$  = Crop area intercept (base year crop area)

$Arealnt2$  = Exogenous crop area growth multiplier

$WF\epsilon$  = Elasticity of demand with respect to land shadow price

$MRP0$  = Base year marginal revenue product (used to index prices)

$A\epsilon$  = Elasticity of area demand with respect to marginal revenue product

Assumptions for exogenous trends are determined by a combination of historical changes in land use and expert judgment on potential future regional dynamics. They are represented as compound growth from the base and are applied between years.

$$Arealnt2_{j,fpu,Ind,t+1} = Arealnt2_{j,fpu,Ind,t} \times \left(1 + Areagr_{fpu,Ind}\right)$$

$Areagr$  = Exogenous area demand growth rate

Competing demands from different crops are handled through an equilibrium equation that determines the land allocation and ensures that all crop area demand sums up to the total land supply for each FPU.

$$QFS_{fpu,Ind} = \sum_j Area_{j,fpu,Ind}$$

Crop yields are a function of commodity prices, prices of inputs, available water, climate, and exogenous trend factors. The IMPACT model includes five ways that changes in yields are achieved. First, the model assumes a scenario of underlying improvements in yields over time that, to varying degrees, continue trends observed during the past 50 to 60 years in an informed extrapolation. These long-run trends, or intrinsic productivity growth rates, are intended to reflect the expected increases in inputs, improved seeds, and improvements in management practices. These trends differ and generally are higher for developing countries, where there is considerable scope to narrow the gap in yields compared to developed countries. These intrinsic productivity growth rates are exogenous to the model, and changes in them are specified as part of the definition of different scenarios. We assume that these underlying trends vary by crop and region and that they will decline somewhat

during the next 50 years as the pace of technological improvements in developed countries slows and as developing countries catch up to yields in developed countries.

Second, the IMPACT model includes a short-run (annual), endogenous, response of yields to changes in both input and output prices. These yield response functions specify the change in yield as a constant elasticity function of the changes in output prices, with elasticity parameters that can vary by crop and region. The underlying assumption is that farmers will respond to changes in prices by varying the use of inputs, including inputs such as fertilizer, chemicals, and labor that will, in turn, change yields.

Third, climate is assumed to affect yields through two mechanisms. The first is through the effects of changes in temperature and weather due to climate change on crop yields for rainfed and irrigated crops, as calculated from the solution of a crop simulation model for different climate change scenarios. These crop simulations vary by crop type. The crop models are run with detailed time, geographic, and crop disaggregation for different climate change scenarios that are downscaled to include weather variation in small geographic areas. This analysis gives changes in average yields due to climate change that are then averaged to generate yield shocks by crop and region. The second mechanism by which climate change affects yields is through variation in water availability for agriculture year by year in different climate scenarios. This mechanism is modeled through the use of the IMPACT water models. These include (1) a global hydrology model that determines runoff to the river basins included in the IMPACT model; (2) water basin management models for each FPU that optimally allocate available water to competing non-agricultural and agricultural uses, including irrigation; and (3) a water allocation and stress model that allocates available irrigation water to crops and, when the water supply is less than demand by crop, computes the impact of the water shortage on crop yields, accounting for differences among crops and varieties. These yields shocks are then passed to the IMPACT model, affecting year-to-year crop yields.

$$Yield_{j,\text{fpu},\text{Ind}} = YieldInt_{j,\text{fpu},\text{Ind}} \times YieldInt2_{j,\text{fpu},\text{Ind}} \times WatShk_{j,\text{fpu},\text{Ind}} \times CliShk_{j,\text{fpu},\text{Ind}} \times \left( \frac{PNET_{j,\text{cty}}}{PNET0_{j,\text{cty}}} \right)^{Y_\varepsilon} \times PF^{F_\varepsilon}$$

*Yield* = Final yield

*YieldInt* = Yield intercept (base year yield)

*YieldInt2* = Exogenous yield growth multiplier

*WatShk* = Water stress shock (from water models)

*CliShk* = Climate change shock (from water and crop models)

$Y_\varepsilon$  = Yield supply elasticity with respect to net price

$PF$  = Input prices

$F_\varepsilon$  = Yield supply elasticity with respect to input prices

Final crop production for each FPU and crop ( $j$ ) is estimated as the product of the solution for its respective area and yield equations, with national production ( $QS_{j,\text{cty}}$ ) equal to the summation of the production in all of the relevant FPUs in that country.

$$QS_{j,\text{cty}} = \sum_{\text{fpu},\text{Ind}} \left( Area_{j,\text{fpu},\text{Ind}} \times Yield_{j,\text{fpu},\text{Ind}} \right)$$

## Livestock Production

Livestock production is modeled at the FPU level and includes animal numbers, with associated feed demands, and meat/dairy production based on processing the animals. Similar to the crop sector, this specification allows for easier translation of information from livestock experts who are used to working with herd-size and feeding requirements. In the current version of the model, there is no modeling of herd dynamics—herd size over time is set exogenously.

Feed demand is a function of the livestock's own price, the prices of intermediate (feed) inputs, and a trend variable reflecting growth in livestock herds (slaughter rates are implicitly assumed to stay more or less constant over time). The price elasticities in the livestock supply function are derived in a fashion similar to how the crop area and yield elasticities are derived.

$$Animals_{j,fpu,livsys} = AnimalInt_{j,fpu,livsys} \times AnimalInt2_{j,fpu,livsys} \times \left( \frac{PNET_{j,cty}}{PNET0_{j,cty}} \right)^{AN\epsilon} \times \prod_{cfeeds} \left( \frac{PC_{c,cty}}{PC0_{c,cty}} \right)^{Feed\epsilon}$$

*Animals* = Number of producing animals

*AnimalInt* = Animal intercept (initial number of animals)

*AnimalInt2* = Exogenous population growth

*PC* = Consumer prices

*PC0* = Initial consumer prices

*Feed $\epsilon$*  = Supply elasticity with respect to changes in feed prices

*livsys* = Livestock production systems

*cfeeds* = Feed commodities demanded by livestock sector

Livestock yields are determined through exogenous growth due to improved animals and management practices. Currently, all price responses in the livestock sector are accounted for in the animal number equations.

$$AnimalYield_{j,fpu,livsys} = AnimalYieldInt_{j,fpu,livsys} \times AnimalYieldInt2_{j,fpu,livsys}$$

*AnimalYield* = Animal yields

*AnimalYieldInt* = Initial animal yields

*AnimalYieldInt2* = Exogenous yield growth

Total national production ( $QS_{j,cty}$ ) is calculated by multiplying the number of slaughtered animals by the yield per head and summing across FPU and livestock system.

$$QS_{j,cty} = \sum_{fpu,livsys} (Animals_{j,fpu,livsys} \times AnimalYield_{j,fpu,livsys})$$

There is work under way to improve the livestock model, incorporating more animal types; a number of feed systems that include pastures, foders, processed feeds, and feed grains; and a more detailed representation of the value chain from feeds to herds to final demand commodities.

### Production of Processed Goods

Modelling of processed goods (that is, food oils, oil meals, sugar) has been an active area of improvement for IMPACT 3, and the development of the activity-commodity framework allows for a general handling of all processed goods in IMPACT through input-output matrixes and the use of net prices. The input-output matrixes represent technical coefficients on input requirements, are specified by quantities of inputs per unit of output (that is, metric tons of soybeans per metric tons of soybean oil), and are calculated from the base data. The net price is the price the producer receives net of input costs. The net price will equal the producer price of the activity whenever there are no intermediate inputs.

$$PNET_{j,cty} = PP_{j,cty} - \sum_{inputs} (IOMAT_{inputs,j,cty} \times (1 - CSEI_{inputs,cty}) \times PC_{inputs,cty})$$

*PNET* = Net price

*PP* = Producer price

*PC* = Consumer price of inputs

*CSEI* = Consumer support estimate on intermediate inputs

*IOMAT* = Input-output matrix

*inputs* = Set of commodities (c) that are inputs into activity j

Production of processed goods is then simulated by a supply function that incorporates both endogenous price effects and exogenous technological change. As opposed to crop and livestock production, processed goods are modeled at the country level instead of at the FPU.

$$QS_{j,cty} = QSInt_{j,cty} \times QSINT2_{j,cty} \times \left( \frac{PNET_{j,cty}}{PNET0_{j,cty}} \right)^{QS\varepsilon}$$

$QS$  = Total production

$QSInt$  = Initial production

$QSInt2$  = Exogenous productivity growth

$QS\varepsilon$  = Supply elasticity with respect to net price

### Commodity Demand

Total domestic demand for a commodity is the sum of household food demand, agricultural intermediate demand (feed and processed goods), and intermediate demand from other sectors (that is, for biofuels and industrial uses).

$$QD_{c,cty} = \sum_h (QH_{c,h,cty}) + QInterm_{c,cty} + QL_{c,cty} + QBF_{c,cty} + QOTH_{c,cty}$$

$QD$  = Total commodity demand

$QH$  = Household food demand

$QInterm$  = Intermediate demand from Ag-processing sector

$QL$  = Feed demand from livestock sector

$QBF$  = Intermediate demand for biofuel feedstock

$QOth$  = All other demand

$h$  = Household type

Food demand is a function of the price of the commodity and the prices of other competing commodities, per capita income, and total population. Per capita income and population increase annually according to country-specific population and income growth rates. Population and gross domestic product (GDP) trends vary by scenario and are drawn from the Shared Socio-economic Pathway (SSP) describes in a later section. The IMPACT demand elasticities are estimated and adjusted to represent a synthesis of average, aggregate elasticities for each region, given the income level and distribution of urban and rural population. Over time the elasticities are adjusted to accommodate the gradual shift in demand from staples to high-value commodities like meat, especially in developing countries. This assumption is based on expected economic growth, increased urbanization, and continued commercialization of the agricultural sector. IMPACT is designed to simulate multiple types of households (that is, rural, urban, rich, poor, and so forth); however, currently, IMPACT treats household demand with one representative consumer per country.



$$QH_{c,h,cty} = QHInt_{c,h,cty} \times \left( \frac{pcGDP_{h,cty}}{pcGDP0_{h,cty}} \right)^{Inc\epsilon} \times \left( \frac{(1-CSE_{c,cty}) \times PC_{c,cty}}{(1-CSE0_{c,cty}) \times PC0_{c,cty}} \right)^{HF\epsilon}$$

$$\times \prod_{cc \neq c} \left( \frac{(1-CSE_{cc,cty}) \times PC_{cc,cty}}{(1-CSE0_{cc,cty}) \times PC0_{cc,cty}} \right)^{HF\epsilon} \times \frac{PopH_{h,cty}}{PopH0_{h,cty}}$$

$QH$  = Household food demand

$QHInt$  = Initial household food demand

$pcGDP$  = Per capita GDP

$pcGDP0$  = Initial per capita GDP

$CSE$  = Consumer support estimate

$CSE0$  = Initial consumer support estimate

$PopH$  = Population disaggregated by household type

$PopH0$  = Initial household population

$Inc\epsilon$  = Income demand elasticity

$HF\epsilon$  = Price demand elasticity

$$\left( \frac{(1-CSE) \times PC}{(1-CSE0) \times PC0} \right)^{HF\epsilon} = \text{Own-price response}$$

$$\prod_{cc \neq c} \left( \frac{(1-CSE) \times PC}{(1-CSE0) \times PC0} \right)^{HF\epsilon} = \text{Cross-price response}$$

Feed demand is a derived intermediate demand. It is determined by two components: (1) animal feed requirements determined by livestock production and livestock feed requirements and (2) price effects that take into account potential substitution possibilities among different feeds. The equation also incorporates a technology parameter that indicates improvements in feeding efficiencies over time.

$$QL_{c,cty} = \sum_{jlvst} (QS_{jlvst,cty} \times Re q_{jlvst,c,cty}) \times \prod_{cfeeds} \left( \frac{PC_{c,cty}}{PC0_{c,cty}} \right)^{LFD\epsilon}$$

$QL$  = Total feed demand for livestock sector

$QS$  = Total production of each livestock activity

$Re q$  = Feed requirements for each livestock activity

$LFD\epsilon$  = Price elasticity of demand for feed

$jlvst$  = Set of livestock producing activities

Intermediate demand is a derived demand that is based on the demand for final processed goods, such as food oils and sugar. The input-output matrix determines the proportions of inputs (c) required for each producing activity (j).

$$QDInterm_{c,cty} = \sum_j (IOMat_{c,j,cty} \times QS_{j,cty})$$

$QDInterm$  = Intermediate demand

$IOMat$  = Input-Output matrix

Exogenous biofuel feedstock demand is determined through exogenous growth rates, which represent government mandates to encourage the production of biofuels, though adjusted in various scenarios where the mandates are infeasible or adjusted to reflect scenarios on the role of first- or second-generation biofuels. The biofuel feedstock demand equation also allows for a price response for biofuels to allow for substitution across different potential feedstocks as well as to reflect the reality that increasing food prices would put pressure to ease biofuel mandates.

$$QBF_{c,cty} = QBFInt_{c,cty} \times QBFINT2_{c,cty} \times \prod_c \left( \frac{PC_{c,cty}}{PC0_{c,cty}} \right)^{BF\epsilon}$$

$QBF$  = Biofuel feedstock demand

$QBFInt$  = Initial demand from biofuel sector

$QBFInt2$  = Exogenous growth in demand from biofuels

$BF\epsilon$  = Price elasticity of demand for biofuel feedstock

Other demand summarizes all other demands for agricultural products from sectors outside of the focus of IMPACT (for example, seeds, industrial use, and waste). It is simulated under two equations. The primary method follows the household food demand equation and is sensitive to changes in income, population, and prices.

$$QOth_{c,cty} = QOthInt_{c,cty} \times \left( \frac{pcGDP_{cty}}{pcGDP0_{cty}} \right)^{IOth\epsilon} \times \left( \frac{POP_{cty}}{POP0_{cty}} \right) \times \prod_{cc} \left( \frac{PC_{c,cty}}{PC0_{c,cty}} \right)^{POth\epsilon}$$

$QOth$  = Other Demand

$QOthInt$  = Initial other demand

$IOth\epsilon$  = Income demand elasticity for other demand

$POth\epsilon$  = Price demand elasticity for other demand

The second method is used in a few cases where other demand historically has not shown much of a response to prices and is instead a function of changes in per capita GDP from the previous year ( $pcGDP1$ ).

$$QOth_{c,cty} = QOth1_{c,cty} \times \frac{pcGDP_{cty}}{pcGDP1_{cty}}$$

$QOth$  = Other demand

$QOth1$  = Lagged other demand

$pcGDP1$  = Lagged per capita GDP

## Markets, Trade, and Equilibrium Prices

The system of equations finds a set of domestic and world prices for all crops that clear domestic and international commodity markets. The world price of a commodity is the equilibrating mechanism for traded commodities—when an exogenous shock is introduced in the model, world price will adjust to clear world markets, and each adjustment is passed back to the effective producer and consumer prices via the price transmission equations. Changes in domestic prices subsequently affect commodity supply and demand, necessitating their iterative readjustments until world supply and demand balance and world net trade again equals 0. For non-traded commodities, domestic prices in each country adjust to equate supply and demand within the country.

IMPACT assumes a closed world economy—at the end of every year the world's production must equal the world's demand. This constraint is ensured by the following equation, where the sum of net trade over the globe must equal 0.

$$\sum_{cty} NT_{c,cty} = 0$$

$NT$  = Net Trade

National production and demand for tradable commodities are linked to world markets through trade. Commodity trade by country (cty) is a function of domestic production, domestic demand, and stock change. Regions with positive net trade are net exporters, while those with negative values are net importers. This specification does not permit a separate identification of international trade by country of origin and destination—all countries export to and import from a single global market.

$$NT_{c,cty} = QSUP_{c,cty} - QD_{c,cty} - QSt_{c,cty}$$

$NT$  = Net trade

$QSt$  = Change in stocks

Prices are endogenous in the system of equations for food and are calibrated to 2005 commodity prices, are reported in constant 2005 US dollars. Domestic prices of tradable commodities are a function of world prices, adjusted by the effect of trade policy represented by taxes and tariffs, and price policies are expressed in terms of producer support estimates (PSEs), consumer support estimates (CSEs), and the cost of moving products from one market to another represented by marketing margins (MMs). Export taxes and import tariffs are also included to allow the representation of national trade policies and their impacts on agricultural markets. MMs reflect other factors such as transport and marketing costs of getting goods to various markets and are based on expert opinion on the quality and availability of transportation, communication, and market infrastructure.

The model includes three markets: (1) the farm gate, where producers sell their output to purchasers in producer prices; (2) a national market, where the purchasers then take the commodity, incurring any taxes/subsidies and trade/transportation costs; and (3) the port where exports are sold to foreigners and imports are bought from them at world market prices. Moving commodities to and from the port incurs MMs and any taxes/subsidies/tariffs. In the model, PSEs, CSEs, and MMs are expressed as percentages (ad valorem) of the world price. To calculate producer prices the appropriate wedges are applied to the domestic consumer prices ( $PC$ ) and represent the markup observed in domestic markets from the farm-gate or factory-gate prices producers receive. The producer price of an activity is the weighted sum of the prices of the commodities associated with that activity.

$$PP_{j,cty} \times (1 + MMJ_{j,cty}) = (1 + PSE_{j,cty}) \times \sum_c JCRatio_{j,c,cty} \times PC_{c,cty}$$

$PP$  = Producer price  
 $MMJ$  = Farm(factory)-gate to domestic market Marketing Margin (MM)  
 $PSE$  = Producer support estimate, ad valorem component  
 $JCRatio$  = mapping from activities (j) to commodities (c)

How consumer prices are determined in IMPACT depends on the state of tradability of the commodity. Commodities can be specified as either tradable or non-tradable. Traded commodity prices are determined in international markets. Non-traded commodities are those commodities whose prices are determined in national markets, without direct links to international markets. Examples include sugarcane, sugar beets, and grass, where all demand is intermediate demand from domestic sectors (sugar processing and livestock). These commodity prices are determined endogenously by country and ensure that domestic supply equals domestic demand.

$$Q SUP_{c,cty} = Q D_{c,cty}$$

Non-traded commodities are indirectly linked to world markets through the demand for final products (that is, sugar), and potential substitution from tradable commodities (that is, grass and other feeds). IMPACT 3 also has been designed to allow the tradability of a commodity to be determined endogenously. As the IMPACT model includes price wedges between domestic and international markets, the prices of exports received by producers and of imports paid by consumers can be modeled in separate equations.

$$PM_{c,cty} = PW_c \times EXR_{cty} \times (1 + TM_{c,cty}) \times (1 + MMM_{c,cty})$$

$$PE_{c,cty} = PW_c \times EXR_{cty} \times (1 - TE_{c,cty}) \times (1 - MME_{c,cty})$$

$PM$  = Import Price  
 $PE$  = Export Price  
 $PW$  = World Price  
 $EXR$  = Exchange Rate (currently =1)  
 $TM$  = Import tariff (ad valorem)  
 $TE$  = Export tax (ad valorem)  
 $MMM$  = Marketing margin for importing to domestic market  
 $MME$  = Marketing margin for exporting to international market

If the equilibrium domestic price falls between the floor price of exports and the ceiling price of imports, then there will be no international trade. If conditions change (over time or for different scenarios) such that the equilibrium domestic price either falls to the export price or rises to the import price, the model will endogenously change the regime and clear the market through international trade. To start importing the

domestic import price must equal the consumer price (global prices are lower than domestic prices), and to start exporting domestic prices must be equal to export prices (domestic prices are greater than global prices).

Imports if  $PC_{c,cty} \leq PM_{c,cty}$

Exports if  $PC_{c,cty} \geq PE_{c,cty}$

Domestically traded if  $PE_{c,cty} \leq PC_{c,cty} \leq PM_{c,cty}$

For purely tradable goods, where we want the commodities to always be linked to world markets, this inequality is not used, the domestic consumer price is set to the import price, and the export price equation is never used.

$$PC_{c,cty} = PM_{c,cty}$$

### Fruit and Vegetable Commodities in IMPACT

Of IMPACT's 62 simulated agricultural commodities four are relevant to the fruit and vegetable discussion. Table S2 summarizes these commodities, and what items from FAOSTAT are represented within them.

**Table S2 Fruit and Vegetable commodities in IMPACT and equivalent commodities in FAOSTAT**

| IMPACT code | IMPACT name           | FAO name                | FAO Code |
|-------------|-----------------------|-------------------------|----------|
| jbanana     | Bananas               | Bananas                 | 2615     |
| jsubf       | (Sub)-Tropical Fruits | Oranges, Mandarins      | 2611     |
|             |                       | Lemons, Limes           | 2612     |
|             |                       | Grapefruit              | 2613     |
|             |                       | Citrus, Other           | 2614     |
|             |                       | Pineapples              | 2618     |
|             |                       | Dates                   | 2619     |
| jtemf       | Temperate Fruits      | Apples                  | 2617     |
|             |                       | Grapes                  | 2620     |
|             |                       | Fruit, other            | 2625     |
|             |                       | Fruits - Excluding Wine | 2919     |
| jvege       | Vegetables            | Tomatoes                | 2601     |
|             |                       | Onions                  | 2602     |
|             |                       | Vegetables, Other       | 2605     |
|             |                       | Pepper                  | 2640     |
|             |                       | Pimento                 | 2641     |

Source: Robinson et al.<sup>23</sup>

### IMPACT Regional Definitions

IMPACT simulates agricultural production, trade and demand globally and nationally with a high level of regional disaggregation for a global model. IMPACT simulates agricultural markets in 158 countries, which we have grouped into 9 geographic regions and 2 income groups (developed and developing) for reporting and analysis purposes. Table S3 presents IMPACT countries and regions, along with the regions in which they have been grouped for this analysis.

**Table S3 IMPACT Countries and Regional Definitions**

| IMPACT Code | IMPACT Name | ISO Code | ISO Name    | Region Code(s) | Region(s)                                                |
|-------------|-------------|----------|-------------|----------------|----------------------------------------------------------|
| AFG         | Afghanistan | AFG      | Afghanistan | SAS, DVG, WLD  | South Asia, Developing Countries, World                  |
| AGO         | Angola      | AGO      | Angola      | SSA, DVG, WLD  | Sub-Saharan Africa, Developing Countries, World          |
| ALB         | Albania     | ALB      | Albania     | EUR, DVG, WLD  | Europe, Developing Countries, World                      |
| ARG         | Argentina   | ARG      | Argentina   | LAC, DVG, WLD  | Latin America and Caribbean, Developing Countries, World |
| ARM         | Armenia     | ARM      | Armenia     | FSU, DVG, WLD  | Former Soviet Union, Developing Countries, World         |
| AUS         | Australia   | AUS      | Australia   | EAP, DVD, WLD  | East Asia and Pacific, Developed Countries, World        |

| <b>IMPACT Code</b> | <b>IMPACT Name</b>           | <b>ISO Code</b> | <b>ISO Name</b>              | <b>Region Code(s)</b> | <b>Region(s)</b>                                          |
|--------------------|------------------------------|-----------------|------------------------------|-----------------------|-----------------------------------------------------------|
| AUT                | Austria                      | AUT             | Austria                      | EUR, DVD, WLD         | Europe, Developed Countries, World                        |
| AZE                | Azerbaijan                   | AZE             | Azerbaijan                   | FSU, DVG, WLD         | Former Soviet Union, Developing Countries, World          |
| BDI                | Burundi                      | BDI             | Burundi                      | SSA, DVG, WLD         | Sub-Saharan Africa, Developing Countries, World           |
| BEN                | Benin                        | BEN             | Benin                        | SSA, DVG, WLD         | Sub-Saharan Africa, Developing Countries, World           |
| BFA                | Burkina Faso                 | BFA             | Burkina Faso                 | SSA, DVG, WLD         | Sub-Saharan Africa, Developing Countries, World           |
| BGD                | Bangladesh                   | BGD             | Bangladesh                   | SAS, DVG, WLD         | South Asia, Developing Countries, World                   |
| BGR                | Bulgaria                     | BGR             | Bulgaria                     | EUR, DVG, WLD         | Europe, Developing Countries, World                       |
| BLR                | Belarus                      | BLR             | Belarus                      | FSU, DVG, WLD         | Former Soviet Union, Developing Countries, World          |
| BLT                | Baltic States                | EST             | Estonia                      | EUR, DVD, WLD         | Europe, Developed Countries, World                        |
|                    |                              | LTU             | Lithuania                    |                       |                                                           |
|                    |                              | LVA             | Latvia                       |                       |                                                           |
| BLX                | Belgium-Luxembourg           | BEL             | Belgium                      | EUR, DVD, WLD         | Europe, Developed Countries, World                        |
|                    |                              | LUX             | Luxembourg                   |                       |                                                           |
| BLZ                | Belize                       | BLZ             | Belize                       | LAC, DVG, WLD         | Latin America and Caribbean, Developing Countries, World  |
| BOL                | Bolivia                      | BOL             | Bolivia                      | LAC, DVG, WLD         | Latin America and Caribbean, Developing Countries, World  |
| BRA                | Brazil                       | BRA             | Brazil                       | LAC, DVG, WLD         | Latin America and Caribbean, Developing Countries, World  |
| BTN                | Bhutan                       | BTN             | Bhutan                       | SAS, DVG, WLD         | South Asia, Developing Countries, World                   |
| BWA                | Botswana                     | BWA             | Botswana                     | SSA, DVG, WLD         | Sub-Saharan Africa, Developing Countries, World           |
| CAF                | Central African Republic     | CAF             | Central African Republic     | SSA, DVG, WLD         | Sub-Saharan Africa, Developing Countries, World           |
| CAN                | Canada                       | CAN             | Canada                       | NAM, DVD, WLD         | North America, Developed Countries, World                 |
| CHL                | Chile                        | CHL             | Chile                        | LAC, DVG, WLD         | Latin America and Caribbean, Developing Countries, World  |
| CHM                | China Plus                   | CHN             | China                        | EAP, DVG, WLD         | East Asia and Pacific, Developing Countries, World        |
|                    |                              | HKG             | Hong Kong                    |                       |                                                           |
|                    |                              | MAC             | Macao                        |                       |                                                           |
|                    |                              | TWN             | Taiwan                       |                       |                                                           |
| CHP                | Switzerland Plus             | CHE             | Switzerland                  | EUR, DVD, WLD         | Europe, Developed Countries, World                        |
|                    |                              | LIE             | Liechtenstein                |                       |                                                           |
| CIV                | Ivory Coast                  | CIV             | Ivory Coast                  | SSA, DVG, WLD         | Sub-Saharan Africa, Developing Countries, World           |
| CMR                | Cameroon                     | CMR             | Cameroon                     | SSA, DVG, WLD         | Sub-Saharan Africa, Developing Countries, World           |
| COD                | Democratic Republic of Congo | COD             | Democratic Republic of Congo | SSA, DVG, WLD         | Sub-Saharan Africa, Developing Countries, World           |
| COG                | Congo                        | COG             | Congo                        | SSA, DVG, WLD         | Sub-Saharan Africa, Developing Countries, World           |
| COL                | Colombia                     | COL             | Colombia                     | LAC, DVG, WLD         | Latin America and Caribbean, Developing Countries, World  |
| CRI                | Costa Rica                   | CRI             | Costa Rica                   | LAC, DVG, WLD         | Latin America and Caribbean, Developing Countries, World  |
| CUB                | Cuba                         | CUB             | Cuba                         | LAC, DVG, WLD         | Latin America and Caribbean, Developing Countries, World  |
| CYP                | Cyprus                       | CYP             | Cyprus                       | EUR, DVD, WLD         | Europe, Developed Countries, World                        |
| CZE                | Czech Republic               | CZE             | Czech Republic               | EUR, DVD, WLD         | Europe, Developed Countries, World                        |
| DEU                | Germany                      | DEU             | Germany                      | EUR, DVD, WLD         | Europe, Developed Countries, World                        |
| DJI                | Djibouti                     | DJI             | Djibouti                     | SSA, DVG, WLD         | Sub-Saharan Africa, Developing Countries, World           |
| DNK                | Denmark                      | DNK             | Denmark                      | EUR, DVD, WLD         | Europe, Developed Countries, World                        |
| DOM                | Dominican Republic           | DOM             | Dominican Republic           | LAC, DVG, WLD         | Latin America and Caribbean, Developing Countries, World  |
| DZA                | Algeria                      | DZA             | Algeria                      | MEN, DVG, WLD         | Middle East and North Africa, Developing Countries, World |
| ECU                | Ecuador                      | ECU             | Ecuador                      | LAC, DVG, WLD         | Latin America and Caribbean, Developing Countries, World  |

| <b>IMPACT Code</b> | <b>IMPACT Name</b>    | <b>ISO Code</b> | <b>ISO Name</b>   | <b>Region Code(s)</b> | <b>Region(s)</b>                                          |
|--------------------|-----------------------|-----------------|-------------------|-----------------------|-----------------------------------------------------------|
| EGY                | Egypt                 | EGY             | Egypt             | MEN, DVG, WLD         | Middle East and North Africa, Developing Countries, World |
| ERI                | Eritrea               | ERI             | Eritrea           | SSA, DVG, WLD         | Sub-Saharan Africa, Developing Countries, World           |
| ETH                | Ethiopia              | ETH             | Ethiopia          | SSA, DVG, WLD         | Sub-Saharan Africa, Developing Countries, World           |
| FJI                | Fiji                  | FJI             | Fiji              | EAP, DVG, WLD         | East Asia and Pacific, Developing Countries, World        |
| FNP                | Finland Plus          | ALA             | Aland Islands     | EUR, DVD, WLD         | Europe, Developed Countries, World                        |
|                    |                       | FIN             | Finland           |                       |                                                           |
| FRP                | France Plus           | FRA             | France            | EUR, DVD, WLD         | Europe, Developed Countries, World                        |
|                    |                       | MCO             | Monaco            |                       |                                                           |
| GAB                | Gabon                 | GAB             | Gabon             | SSA, DVG, WLD         | Sub-Saharan Africa, Developing Countries, World           |
| GEO                | Georgia               | GEO             | Georgia           | FSU, DVG, WLD         | Former Soviet Union, Developing Countries, World          |
| GHA                | Ghana                 | GHA             | Ghana             | SSA, DVG, WLD         | Sub-Saharan Africa, Developing Countries, World           |
| GIN                | Guinea                | GIN             | Guinea            | SSA, DVG, WLD         | Sub-Saharan Africa, Developing Countries, World           |
| GMB                | Gambia                | GMB             | Gambia            | SSA, DVG, WLD         | Sub-Saharan Africa, Developing Countries, World           |
| GNB                | Guinea-Bissau         | GNB             | Guinea-Bissau     | SSA, DVG, WLD         | Sub-Saharan Africa, Developing Countries, World           |
| GNQ                | Equatorial Guinea     | GNQ             | Equatorial Guinea | SSA, DVG, WLD         | Sub-Saharan Africa, Developing Countries, World           |
| GRC                | Greece                | GRC             | Greece            | EUR, DVD, WLD         | Europe, Developed Countries, World                        |
| GRL                | Greenland             | GRL             | Greenland         | NAM, DVD, WLD         | North America, Developed Countries, World                 |
| GSA                | Guyanas South America | GUF             | French Guiana     | LAC, DVG, WLD         | Latin America and Caribbean, Developing Countries, World  |
|                    |                       | GUY             | Guyana            |                       |                                                           |
|                    |                       | SUR             | Suriname          |                       |                                                           |
| GTM                | Guatemala             | GTM             | Guatemala         | LAC, DVG, WLD         | Latin America and Caribbean, Developing Countries, World  |
| HND                | Honduras              | HND             | Honduras          | LAC, DVG, WLD         | Latin America and Caribbean, Developing Countries, World  |
| HRV                | Croatia               | HRV             | Croatia           | EUR, DVD, WLD         | Europe, Developed Countries, World                        |
| HTI                | Haiti                 | HTI             | Haiti             | LAC, DVG, WLD         | Latin America and Caribbean, Developing Countries, World  |
| HUN                | Hungary               | HUN             | Hungary           | EUR, DVD, WLD         | Europe, Developed Countries, World                        |
| IDN                | Indonesia             | IDN             | Indonesia         | EAP, DVG, WLD         | East Asia and Pacific, Developing Countries, World        |
| IND                | India                 | IND             | India             | SAS, DVG, WLD         | South Asia, Developing Countries, World                   |
| IRL                | Ireland               | IRL             | Ireland           | EUR, DVD, WLD         | Europe, Developed Countries, World                        |
| IRN                | Iran                  | IRN             | Iran              | MEN, DVG, WLD         | Middle East and North Africa, Developing Countries, World |
| IRQ                | Iraq                  | IRQ             | Iraq              | MEN, DVG, WLD         | Middle East and North Africa, Developing Countries, World |
| ISL                | Iceland               | ISL             | Iceland           | EUR, DVD, WLD         | Europe, Developed Countries, World                        |
| ISR                | Israel                | ISR             | Israel            | MEN, DVD, WLD         | Middle East and North Africa, Developed Countries, World  |
| ITP                | Italy Plus            | ITA             | Italy             | EUR, DVD, WLD         | Europe, Developed Countries, World                        |
|                    |                       | MLT             | Malta             |                       |                                                           |
|                    |                       | SMR             | San Marino        |                       |                                                           |
|                    |                       | VAT             | Vatican City      |                       |                                                           |
| JAM                | Jamaica               | JAM             | Jamaica           | LAC, DVG, WLD         | Latin America and Caribbean, Developing Countries, World  |
| JOR                | Jordan                | JOR             | Jordan            | MEN, DVG, WLD         | Middle East and North Africa, Developing Countries, World |
| JPN                | Japan                 | JPN             | Japan             | EAP, DVD, WLD         | East Asia and Pacific, Developed Countries, World         |
| KAZ                | Kazakhstan            | KAZ             | Kazakhstan        | FSU, DVG, WLD         | Former Soviet Union, Developing Countries, World          |
| KEN                | Kenya                 | KEN             | Kenya             | SSA, DVG, WLD         | Sub-Saharan Africa, Developing Countries, World           |
| KGZ                | Kyrgyzstan            | KGZ             | Kyrgyzstan        | FSU, DVG, WLD         | Former Soviet Union, Developing Countries, World          |
| KHM                | Cambodia              | KHM             | Cambodia          | EAP, DVG, WLD         | East Asia and Pacific, Developing Countries, World        |
| KOR                | South Korea           | KOR             | South Korea       | EAP, DVD, WLD         | East Asia and Pacific, Developed Countries, World         |

| <b>IMPACT Code</b> | <b>IMPACT Name</b>             | <b>ISO Code</b> | <b>ISO Name</b>                | <b>Region Code(s)</b> | <b>Region(s)</b>                                          |
|--------------------|--------------------------------|-----------------|--------------------------------|-----------------------|-----------------------------------------------------------|
| LAO                | Laos                           | LAO             | Laos                           | EAP, DVG, WLD         | East Asia and Pacific, Developing Countries, World        |
| LBN                | Lebanon                        | LBN             | Lebanon                        | MEN, DVG, WLD         | Middle East and North Africa, Developing Countries, World |
| LBR                | Liberia                        | LBR             | Liberia                        | SSA, DVG, WLD         | Sub-Saharan Africa, Developing Countries, World           |
| LBY                | Libya                          | LBY             | Libya                          | MEN, DVG, WLD         | Middle East and North Africa, Developing Countries, World |
| LKA                | Sri Lanka                      | LKA             | Sri Lanka                      | SAS, DVG, WLD         | South Asia, Developing Countries, World                   |
| LSO                | Lesotho                        | LSO             | Lesotho                        | SSA, DVG, WLD         | Sub-Saharan Africa, Developing Countries, World           |
| MDA                | Moldova                        | MDA             | Moldova                        | FSU, DVG, WLD         | Former Soviet Union, Developing Countries, World          |
| MDG                | Madagascar                     | MDG             | Madagascar                     | SSA, DVG, WLD         | Sub-Saharan Africa, Developing Countries, World           |
| MEX                | Mexico                         | MEX             | Mexico                         | LAC, DVG, WLD         | Latin America and Caribbean, Developing Countries, World  |
| MLI                | Mali                           | MLI             | Mali                           | SSA, DVG, WLD         | Sub-Saharan Africa, Developing Countries, World           |
| MMR                | Myanmar                        | MMR             | Myanmar                        | EAP, DVG, WLD         | East Asia and Pacific, Developing Countries, World        |
| MNG                | Mongolia                       | MNG             | Mongolia                       | EAP, DVG, WLD         | East Asia and Pacific, Developing Countries, World        |
| MOR                | Morocco Plus                   | ESH             | Western Sahara                 | MEN, DVG, WLD         | Middle East and North Africa, Developing Countries, World |
|                    |                                | MAR             | Morocco                        |                       |                                                           |
| MOZ                | Mozambique                     | MOZ             | Mozambique                     | SSA, DVG, WLD         | Sub-Saharan Africa, Developing Countries, World           |
| MRT                | Mauritania                     | MRT             | Mauritania                     | MEN, DVG, WLD         | Middle East and North Africa, Developing Countries, World |
| MWI                | Malawi                         | MWI             | Malawi                         | SSA, DVG, WLD         | Sub-Saharan Africa, Developing Countries, World           |
| MYS                | Malaysia                       | MYS             | Malaysia                       | EAP, DVG, WLD         | East Asia and Pacific, Developing Countries, World        |
| NAM                | Namibia                        | NAM             | Namibia                        | SSA, DVG, WLD         | Sub-Saharan Africa, Developing Countries, World           |
| NER                | Niger                          | NER             | Niger                          | SSA, DVG, WLD         | Sub-Saharan Africa, Developing Countries, World           |
| NGA                | Nigeria                        | NGA             | Nigeria                        | SSA, DVG, WLD         | Sub-Saharan Africa, Developing Countries, World           |
| NIC                | Nicaragua                      | NIC             | Nicaragua                      | LAC, DVG, WLD         | Latin America and Caribbean, Developing Countries, World  |
| NLD                | Netherlands                    | NLD             | Netherlands                    | EUR, DVD, WLD         | Europe, Developed Countries, World                        |
| NOR                | Norway                         | NOR             | Norway                         | EUR, DVD, WLD         | Europe, Developed Countries, World                        |
| NPL                | Nepal                          | NPL             | Nepal                          | SAS, DVG, WLD         | South Asia, Developing Countries, World                   |
| NZL                | New Zealand                    | NZL             | New Zealand                    | EAP, DVD, WLD         | East Asia and Pacific, Developed Countries, World         |
| OBN                | Other Balkans                  | BIH             | Bosnia-Herzegovina             | EUR, DVD, WLD         | Europe, Developed Countries, World                        |
|                    |                                | MKD             | Macedonia (FYR)                |                       |                                                           |
|                    |                                | MNE             | Montenegro                     |                       |                                                           |
|                    |                                | SRB             | Serbia                         |                       |                                                           |
| OSA                | Other Southeast Asia           | BRN             | Brunei                         | EAP, DVG, WLD         | East Asia and Pacific, Developing Countries, World        |
|                    |                                | SGP             | Singapore                      |                       |                                                           |
| PAK                | Pakistan                       | PAK             | Pakistan                       | SAS, DVG, WLD         | South Asia, Developing Countries, World                   |
| PAN                | Panama                         | PAN             | Panama                         | LAC, DVG, WLD         | Latin America and Caribbean, Developing Countries, World  |
| PER                | Peru                           | PER             | Peru                           | LAC, DVG, WLD         | Latin America and Caribbean, Developing Countries, World  |
| PHL                | Philippines                    | PHL             | Philippines                    | EAP, DVG, WLD         | East Asia and Pacific, Developing Countries, World        |
| PNG                | Papua New Guinea               | PNG             | Papua New Guinea               | EAP, DVG, WLD         | East Asia and Pacific, Developing Countries, World        |
| POL                | Poland                         | POL             | Poland                         | EUR, DVD, WLD         | Europe, Developed Countries, World                        |
| PRK                | North Korea                    | PRK             | North Korea                    | EAP, DVG, WLD         | East Asia and Pacific, Developing Countries, World        |
| PRT                | Portugal                       | PRT             | Portugal                       | EUR, DVD, WLD         | Europe, Developed Countries, World                        |
| PRY                | Paraguay                       | PRY             | Paraguay                       | LAC, DVG, WLD         | Latin America and Caribbean, Developing Countries, World  |
| PSE                | Occupied Palestinian Territory | PSE             | Occupied Palestinian Territory | MEN, DVG, WLD         | Middle East and North Africa, Developing Countries, World |

| IMPACT Code | IMPACT Name            | ISO Code | ISO Name             | Region Code(s) | Region(s)                                                 |
|-------------|------------------------|----------|----------------------|----------------|-----------------------------------------------------------|
| RAP         | Rest of Arab Peninsula | ARE      | United Arab Emirates | MEN, DVD, WLD  | Middle East and North Africa, Developed Countries, World  |
|             |                        | BHR      | Bahrain              |                |                                                           |
|             |                        | KWT      | Kuwait               |                |                                                           |
|             |                        | OMN      | Oman                 |                |                                                           |
|             |                        | QAT      | Qatar                |                |                                                           |
| ROU         | Romania                | ROU      | Romania              | EUR, DVG, WLD  | Europe, Developing Countries, World                       |
| RUS         | Russia                 | RUS      | Russia               | FSU, DVG, WLD  | Former Soviet Union, Developing Countries, World          |
| RWA         | Rwanda                 | RWA      | Rwanda               | SSA, DVG, WLD  | Sub-Saharan Africa, Developing Countries, World           |
| SAU         | Saudi Arabia           | SAU      | Saudi Arabia         | MEN, DVD, WLD  | Middle East and North Africa, Developed Countries, World  |
| SDN         | Sudan Plus             | SDN      | Sudan                | SSA, DVG, WLD  | Sub-Saharan Africa, Developing Countries, World           |
|             |                        | SSD      | South Sudan          |                |                                                           |
| SEN         | Senegal                | SEN      | Senegal              | SSA, DVG, WLD  | Sub-Saharan Africa, Developing Countries, World           |
| SLB         | Solomon Islands        | SLB      | Solomon Islands      | EAP, DVG, WLD  | East Asia and Pacific, Developing Countries, World        |
| SLE         | Sierra Leone           | SLE      | Sierra Leone         | SSA, DVG, WLD  | Sub-Saharan Africa, Developing Countries, World           |
| SLV         | El Salvador            | SLV      | El Salvador          | LAC, DVG, WLD  | Latin America and Caribbean, Developing Countries, World  |
| SOM         | Somalia                | SOM      | Somalia              | SSA, DVG, WLD  | Sub-Saharan Africa, Developing Countries, World           |
| SPP         | Spain Plus             | AND      | Andorra              | EUR, DVD, WLD  | Europe, Developed Countries, World                        |
|             |                        | ESP      | Spain                |                |                                                           |
|             |                        | GIB      | Gibraltar            |                |                                                           |
| SVK         | Slovakia               | SVK      | Slovakia             | EUR, DVD, WLD  | Europe, Developed Countries, World                        |
| SVN         | Slovenia               | SVN      | Slovenia             | EUR, DVD, WLD  | Europe, Developed Countries, World                        |
| SWE         | Sweden                 | SWE      | Sweden               | EUR, DVD, WLD  | Europe, Developed Countries, World                        |
| SWZ         | Swaziland              | SWZ      | Swaziland            | SSA, DVG, WLD  | Sub-Saharan Africa, Developing Countries, World           |
| SYR         | Syria                  | SYR      | Syria                | MEN, DVG, WLD  | Middle East and North Africa, Developing Countries, World |
| TCD         | Chad                   | TCD      | Chad                 | SSA, DVG, WLD  | Sub-Saharan Africa, Developing Countries, World           |
| TGO         | Togo                   | TGO      | Togo                 | SSA, DVG, WLD  | Sub-Saharan Africa, Developing Countries, World           |
| THA         | Thailand               | THA      | Thailand             | EAP, DVG, WLD  | East Asia and Pacific, Developing Countries, World        |
| TJK         | Tajikistan             | TJK      | Tajikistan           | FSU, DVG, WLD  | Former Soviet Union, Developing Countries, World          |
| TKM         | Turkmenistan           | TKM      | Turkmenistan         | FSU, DVG, WLD  | Former Soviet Union, Developing Countries, World          |
| TLS         | Timor-L'Este           | TLS      | Timor-L'Este         | EAP, DVG, WLD  | East Asia and Pacific, Developing Countries, World        |
| TUN         | Tunisia                | TUN      | Tunisia              | MEN, DVG, WLD  | Middle East and North Africa, Developing Countries, World |
| TUR         | Turkey                 | TUR      | Turkey               | MEN, DVG, WLD  | Middle East and North Africa, Developing Countries, World |
| TZA         | Tanzania               | TZA      | Tanzania             | SSA, DVG, WLD  | Sub-Saharan Africa, Developing Countries, World           |
| UGA         | Uganda                 | UGA      | Uganda               | SSA, DVG, WLD  | Sub-Saharan Africa, Developing Countries, World           |
| UKP         | Great Britain Plus     | GBR      | Great Britain        | EUR, DVD, WLD  | Europe, Developed Countries, World                        |
|             |                        | GGY      | Guernsey             |                |                                                           |
|             |                        | IMN      | Isle of Man          |                |                                                           |
|             |                        | JEY      | Jersey               |                |                                                           |
| UKR         | Ukraine                | UKR      | Ukraine              | FSU, DVG, WLD  | Former Soviet Union, Developing Countries, World          |
| URY         | Uruguay                | URY      | Uruguay              | LAC, DVG, WLD  | Latin America and Caribbean, Developing Countries, World  |
| USA         | United States          | USA      | United States        | NAM, DVD, WLD  | North America, Developed Countries, World                 |
| UZB         | Uzbekistan             | UZB      | Uzbekistan           | FSU, DVG, WLD  | Former Soviet Union, Developing Countries, World          |
| VEN         | Venezuela              | VEN      | Venezuela            | LAC, DVG, WLD  | Latin America and Caribbean, Developing Countries, World  |
| VNM         | Vietnam                | VNM      | Vietnam              | EAP, DVG, WLD  | East Asia and Pacific, Developing Countries, World        |
| VUT         | Vanuatu                | VUT      | Vanuatu              | EAP, DVG, WLD  | East Asia and Pacific, Developing Countries, World        |



| <b>IMPACT Code</b> | <b>IMPACT Name</b> | <b>ISO Code</b> | <b>ISO Name</b> | <b>Region Code(s)</b> | <b>Region(s)</b>                                          |
|--------------------|--------------------|-----------------|-----------------|-----------------------|-----------------------------------------------------------|
| YEM                | Yemen              | YEM             | Yemen           | MEN, DVG, WLD         | Middle East and North Africa, Developing Countries, World |
| ZAF                | South Africa       | ZAF             | South Africa    | SSA, DVG, WLD         | Sub-Saharan Africa, Developing Countries, World           |
| ZMB                | Zambia             | ZMB             | Zambia          | SSA, DVG, WLD         | Sub-Saharan Africa, Developing Countries, World           |
| ZWE                | Zimbabwe           | ZWE             | Zimbabwe        | SSA, DVG, WLD         | Sub-Saharan Africa, Developing Countries, World           |

Source: Robinson et al.<sup>23</sup>

## Applying Food Waste in the Analysis

Food waste is a potential factor in failing to achieving recommended consumption levels of fruits and vegetables. Waste can be defined in a variety of ways. IMPACT reflects this by accounting for Food Losses and Waste at different stages of the food value chain. Initial losses at the point of primary production (crops, animal) are represented in IMPACT as lower crop and animal yields. IMPACT has been used in several studies considering the effects of reducing these harvest and post-harvest losses.<sup>24</sup> Food losses and waste also happen in the processing, and distribution of food commodities from the farm-gate to the market where consumers can access them. These losses are reflected in the FAO commodity balance sheet as waste, and are simulated in IMPACT as a part of Other Demand.<sup>23,25</sup> Recent studies using IMPACT have considered the potential of reducing this waste in efforts to fully quantify SSP 1 and the sustainable development pathway represented by the scenario narrative.<sup>20,21</sup> Consumer waste is not endogenous captured in IMPACT, but is applied post-solution, when trying to convert food availability results from IMPACT into estimated average consumption in recent studies looking at diets and health outcomes.<sup>26,27</sup> Figure S1 summarizes how waste is represented in IMPACT.

**Figure S1 Representation of Food Losses and Waste in IMPACT**

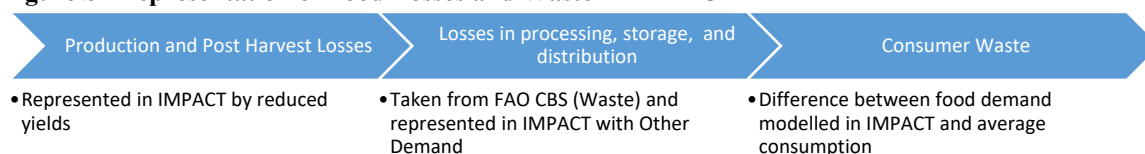

In this analysis we use regional waste estimated by Gustavsson et al.<sup>28</sup> Table S4 summarizes how we applied these regional estimates to IMPACT's geography.

**Table S4 FAO Regional Fruit and Vegetable Waste Estimates Applied to IMPACT regions**

| IMPACT Region                  | Waste Estimate (%) |
|--------------------------------|--------------------|
| Developed Asian Economies      | 15                 |
| East, South and Southeast Asia | 7                  |
| Oceania                        | 28                 |
| Europe                         | 19                 |
| Former Soviet Union            | 12                 |
| Middle East and North Africa   | 12                 |
| Sub-Saharan Africa             | 5                  |
| Latin America and Caribbean    | 10                 |
| North America                  | 28                 |

Source: Waste estimates are drawn from Gustavsson et al.<sup>28</sup> for fruits and vegetables and mapped to the appropriate IMPACT region. IMPACT regional definitions are found in Table S3

Figure S2 summarizes IMPACT projections by 2050 under the SSP 2 scenario. The figure presented the projected ratio of per capita fruit and vegetable availability compared to the minimum target (400 g/person/day) under a range of waste assumptions ranging from no waste to 33 percent waste. These are the disaggregated country results reflected in the regional aggregated results presented in Figure 2.

Summarizes IMPACT projections

**Figure S2 Ratio of per capita fruit & vegetable availability to WHO minimum consumption level (400 g/person/day) under different waste assumptions by 2050 under SSP2.**

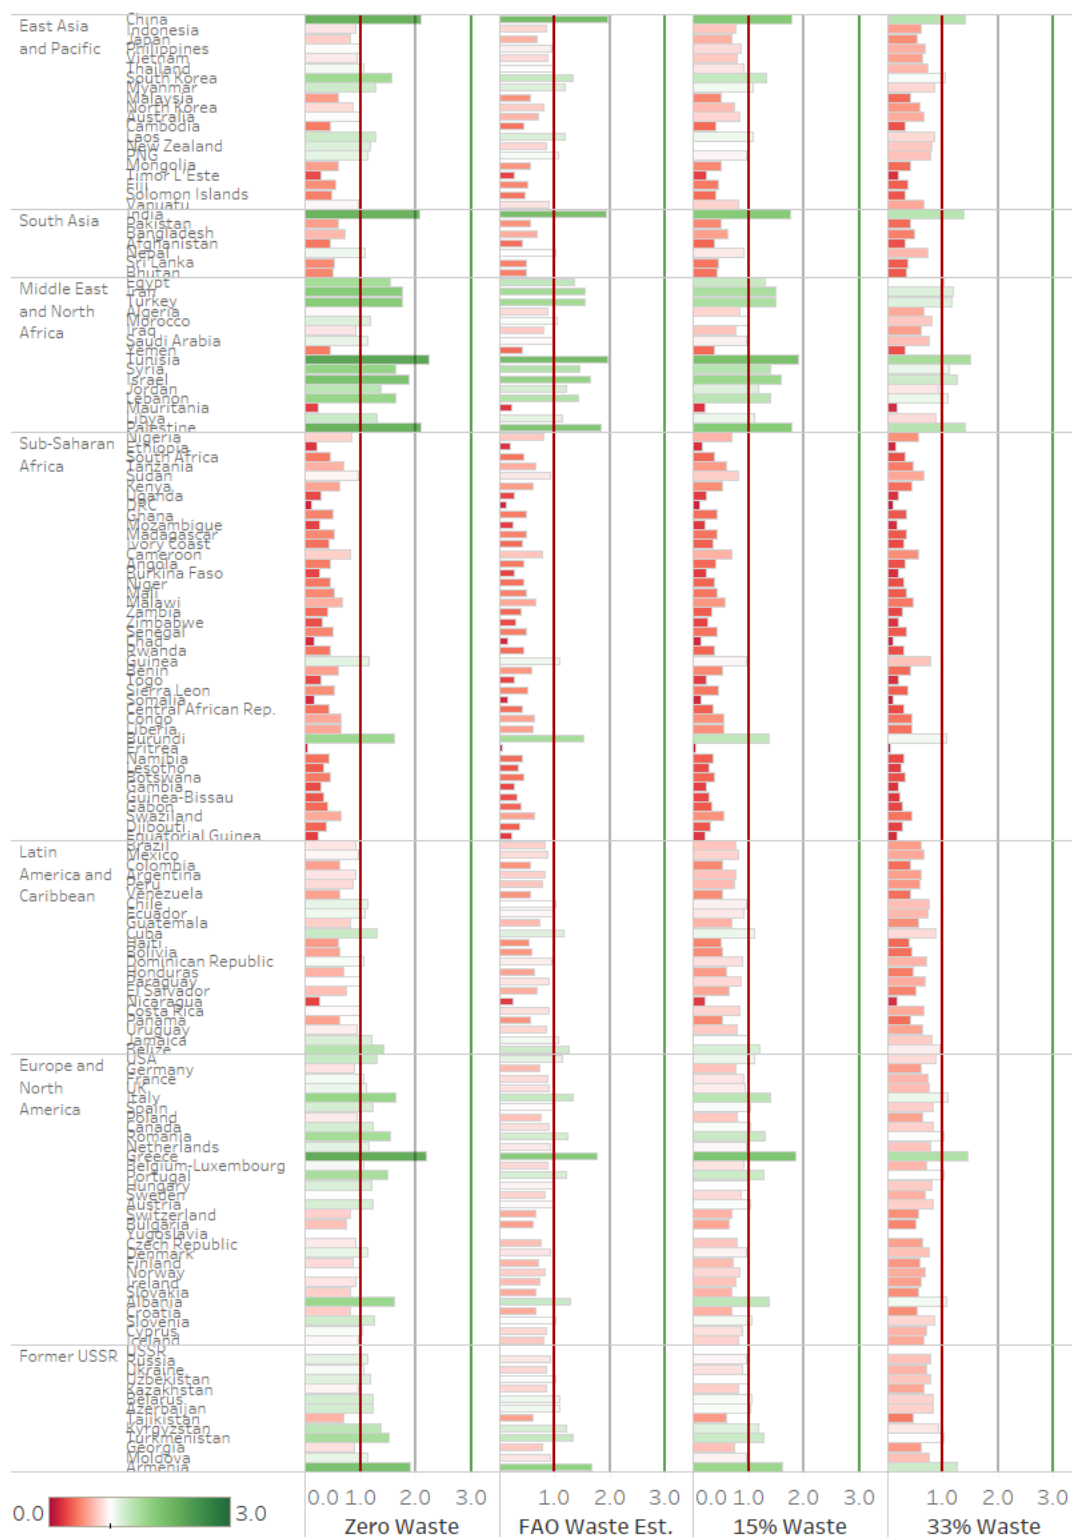

Note: FAO estimate by Gustavsson et al.<sup>28</sup> Each bar represents a country, with countries sorted in descending order by 2010 population. SSP 2 2050 values are projections from IMPACT using default diets (based on historical trends), and vegetables follow WHO definitions excluding legumes, and starchy roots and tubers. The vertical red, gray, and green lines represents when availability (excl. waste) equals 400, 800, and 1200 g/person/day respectively

## Scenario Assumptions

The shared socioeconomic pathways (SSPs) are a set of five global scenarios developed for work by the International Panel for Climate Change (IPCC). They were designed to reflect a range of alternative futures where societal developments presented future challenges to climate change mitigation and adaptation. In this analysis we selected the three scenarios that go from low challenges to both mitigation and adaptation (SSP 1) to high challenges to both mitigation and adaptation (SSP 3). Table S5 represents the axis upon which the SSPs were developed, along with the scenario narratives for the three selected SSPs used in this analysis.

**Table S5 Summary of SSP scenario space and scenario narratives**

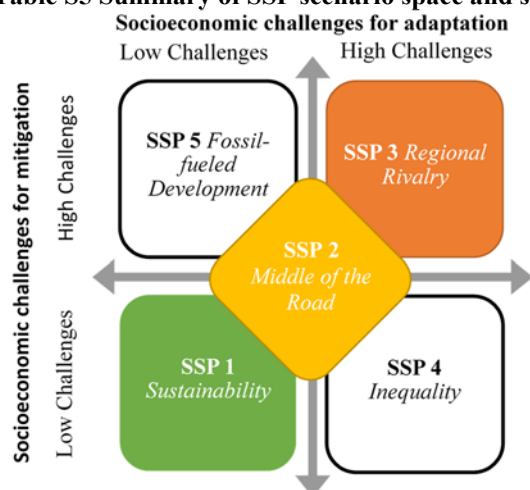

### SSP 2 “Middle of the Road”

The world follows a path in which social, economic, and technological trends do not shift markedly from historical patterns. Development and income growth proceeds unevenly, with some countries making relatively good progress while others fall short of expectations. Global and national institutions work toward but make slow progress in achieving sustainable development goals. Environmental systems experience degradation, although there are some improvements and overall the intensity of resource and energy use declines. Global population growth is moderate and levels off in the second half of the century. Income inequality persists or improves only slowly and challenges to reducing vulnerability to societal and environmental changes remain.

### SSP1 “Sustainability – Taking the Green Road”

The world shifts gradually, but pervasively, toward a more sustainable path, emphasizing more inclusive development that respects perceived environmental boundaries. Management of the global commons slowly improves, educational and health investments accelerate the demographic transition, and the emphasis on economic growth shifts toward a broader emphasis on human well-being. Driven by an increasing commitment to achieving development goals, inequality is reduced both across and within countries. Consumption is oriented toward low material growth and lower resource and energy intensity.

### SSP 3 “Regional Rivalry – A Rocky Road”

A resurgent nationalism, concerns about competitiveness and security, and regional conflicts push countries to increasingly focus on domestic or, at most, regional issues. Policies shift over time to become increasingly oriented toward national and regional security issues. Countries focus on achieving energy and food security goals within their own regions at the expense of broader-based development. Investments in education and technological development decline. Economic development is slow, consumption is material-intensive, and inequalities persist or worsen over time. Population growth is low in industrialized and high in developing countries. A low international priority for addressing environmental concerns leads to strong environmental degradation in some regions.

Source: Figure based on Figure 1 in O’Neill et al.<sup>29</sup>; Scenario descriptions from Riahi et al.<sup>30</sup>

## Socioeconomic assumptions in the SSPs

Table S6 summarizes the quantified socioeconomic assumptions by region and globally for SSP 1–3, and highlights the broad possibility space reflected by these three scenarios with respect to population and economic growth.

**Table S6 Summary of Socioeconomic assumptions of population, GDP, and per capita GDP for SSP 1–3**

|                                                      | 2010   | 2050    |         |         | Average annual growth rate (% per year) |       |       |
|------------------------------------------------------|--------|---------|---------|---------|-----------------------------------------|-------|-------|
| Region                                               |        | SSP 1   | SSP 2   | SSP 3   | SSP 1                                   | SSP 2 | SSP 3 |
| <b>East Asia and the Pacific</b>                     |        |         |         |         |                                         |       |       |
| GDP                                                  | 19,236 | 104,096 | 80,045  | 60,608  | 4.31                                    | 3.63  | 2.91  |
| Population                                           | 2,184  | 2,173   | 2,261   | 2,351   | -0.01                                   | 0.09  | 0.18  |
| GDP per capita                                       | 9      | 48      | 35      | 26      | 4.32                                    | 3.54  | 2.72  |
| <b>Europe</b>                                        |        |         |         |         |                                         |       |       |
| GDP                                                  | 14,628 | 30,571  | 27,780  | 21,342  | 1.86                                    | 1.62  | 0.95  |
| Population                                           | 537    | 592     | 577     | 498     | 0.24                                    | 0.18  | -0.19 |
| GDP per capita                                       | 27     | 52      | 48      | 43      | 1.61                                    | 1.43  | 1.14  |
| <b>Former Soviet Union (excluding Baltic states)</b> |        |         |         |         |                                         |       |       |
| GDP                                                  | 2,855  | 10,603  | 8,984   | 7,551   | 3.33                                    | 2.91  | 2.46  |
| Population                                           | 279    | 262     | 277     | 289     | -0.15                                   | -0.01 | 0.09  |
| GDP per capita                                       | 10     | 40      | 32      | 26      | 3.5                                     | 2.92  | 2.37  |
| <b>Latin America and the Caribbean</b>               |        |         |         |         |                                         |       |       |
| GDP                                                  | 5,834  | 22,838  | 19,164  | 15,894  | 3.47                                    | 3.02  | 2.54  |
| Population                                           | 585    | 674     | 742     | 853     | 0.36                                    | 0.6   | 0.95  |
| GDP per capita                                       | 10     | 34      | 26      | 19      | 3.1                                     | 2.41  | 1.57  |
| <b>Middle East and North Africa</b>                  |        |         |         |         |                                         |       |       |
| GDP                                                  | 4,551  | 20,566  | 18,631  | 16,006  | 3.84                                    | 3.59  | 3.19  |
| Population                                           | 457    | 646     | 715     | 808     | 0.87                                    | 1.13  | 1.43  |
| GDP per capita                                       | 10     | 32      | 26      | 20      | 2.95                                    | 2.43  | 1.73  |
| <b>North America</b>                                 |        |         |         |         |                                         |       |       |
| GDP                                                  | 14,290 | 33,691  | 29,933  | 24,753  | 2.17                                    | 1.87  | 1.38  |
| Population                                           | 344    | 460     | 450     | 372     | 0.73                                    | 0.67  | 0.19  |
| GDP per capita                                       | 41     | 73      | 67      | 67      | 1.43                                    | 1.19  | 1.19  |
| <b>South Asia</b>                                    |        |         |         |         |                                         |       |       |
| GDP                                                  | 4,461  | 44,250  | 32,939  | 22,756  | 5.9                                     | 5.13  | 4.16  |
| Population                                           | 1,630  | 2,108   | 2,373   | 2,720   | 0.65                                    | 0.94  | 1.29  |
| GDP per capita                                       | 3      | 21      | 14      | 8       | 5.23                                    | 4.14  | 2.83  |
| <b>Sub-Saharan Africa</b>                            |        |         |         |         |                                         |       |       |
| GDP                                                  | 1,705  | 19,690  | 13,962  | 9,665   | 6.31                                    | 5.4   | 4.43  |
| Population                                           | 863    | 1,564   | 1,793   | 2,084   | 1.5                                     | 1.84  | 2.23  |
| GDP per capita                                       | 2      | 13      | 8       | 5       | 4.74                                    | 3.49  | 2.16  |
| <b>World</b>                                         |        |         |         |         |                                         |       |       |
| GDP                                                  | 67,559 | 286,305 | 231,439 | 178,575 | 3.68                                    | 3.13  | 2.46  |
| Population                                           | 6,879  | 8,479   | 9,187   | 9,975   | 0.52                                    | 0.73  | 0.93  |
| GDP per capita                                       | 10     | 34      | 25      | 18      | 3.14                                    | 2.38  | 1.51  |

Source: Robinson et al.<sup>23</sup>, calculated from IMPACT 3 base year population and GDP with population and GDP growth rates from KC and Lutz,<sup>31</sup> and Dellink et al.<sup>30</sup>, downloaded from SSP Database<sup>32</sup>.

Note: Population is in millions. GDP (billion 2005 USD) and GDP per capita (000 USD/person) are in purchasing power parity. IMPACT regional definitions are found in Table S3

### **Additional Scenario Assumptions**

The SSPs were quantified in IMPACT beyond just the socioeconomic drivers to incorporate scenario representation of other key components of the scenario narrative including consumption preferences, agricultural productivity, land-use regulation, and trade. This work was done for as inputs to recent AgMIP analysis<sup>20,21</sup>, and is briefly summarized here.

#### *Consumption preferences and sustainable diet*

The SSP storylines describe differences in consumer behavior towards environmental impact of food consumption via food waste and share of animal products in the diet. For SSP 1, the sustainable diet was represented as a reduction in animal sourced food demand and an increase in plant-based diets. This sustainable dietary pathway is generally consistent with that outlined by Willet et al.<sup>19</sup> In the representation of SSP 1 in Hasegawa et al.<sup>20</sup> this sustainable diet was assumed. However, in this analysis we used scenarios where we continued using IMPACT's default diet based on historical trends (CONS2), with the understanding that achieving the sustainable dietary pathway will require more efforts in the policy space than currently observed. The scenario representation of SSP 1 with default diet was quantified as a part of a decomposition exercise to better understand the impacts of different scenario assumptions detailed in work by Stehfest et al.<sup>21</sup> For comparison purposes, Figure S3 shows the results in 2050 under SSP 1–3 using both the default assumption used in this study as well as the exogenous sustainable diet assumption.

#### *Agricultural productivity*

The SSP storylines describe fast technological change and respect for environmental boundaries for SSP1, and slower technological change in agricultural systems in SSP3. We adjust agricultural productivity based on the relationships between GDP, agricultural R&D and investment levels, and relationships between agricultural R&D and agricultural productivity. These relationships are described in more detail in Rosegrant et al.<sup>33</sup> and Mason-D'Croz et al.<sup>34</sup>

#### *Land-Use Regulation*

Land-use regulation was varied across the SSPs, and were implemented in IMPACT as exogenous assumptions on the availability of future land to be converted to agricultural uses, with land expansion curtailed under SSP 1 as compared to SSP 2. SSP 3 mirrored this treatment, with additional land allowed to be converted to agricultural uses.

#### *Trade*

Trade in agricultural commodities is effected by trade policy as describing in the market equilibrium and trade section above. To reflect varying levels of openness to global trade in the scenario narratives, current trade barriers were reduced in SSP 1 as compared to SSP 2, which uses current trade policies. Similar to land-use, in SSP 3 trade barriers were increased.

**Figure S3 Comparing the ratio of fruit & vegetable availability to WHO minimum recommendation by 2050 for SSP 1–3 under different exogenous assumptions (default and sustainable) on future dietary transitions**

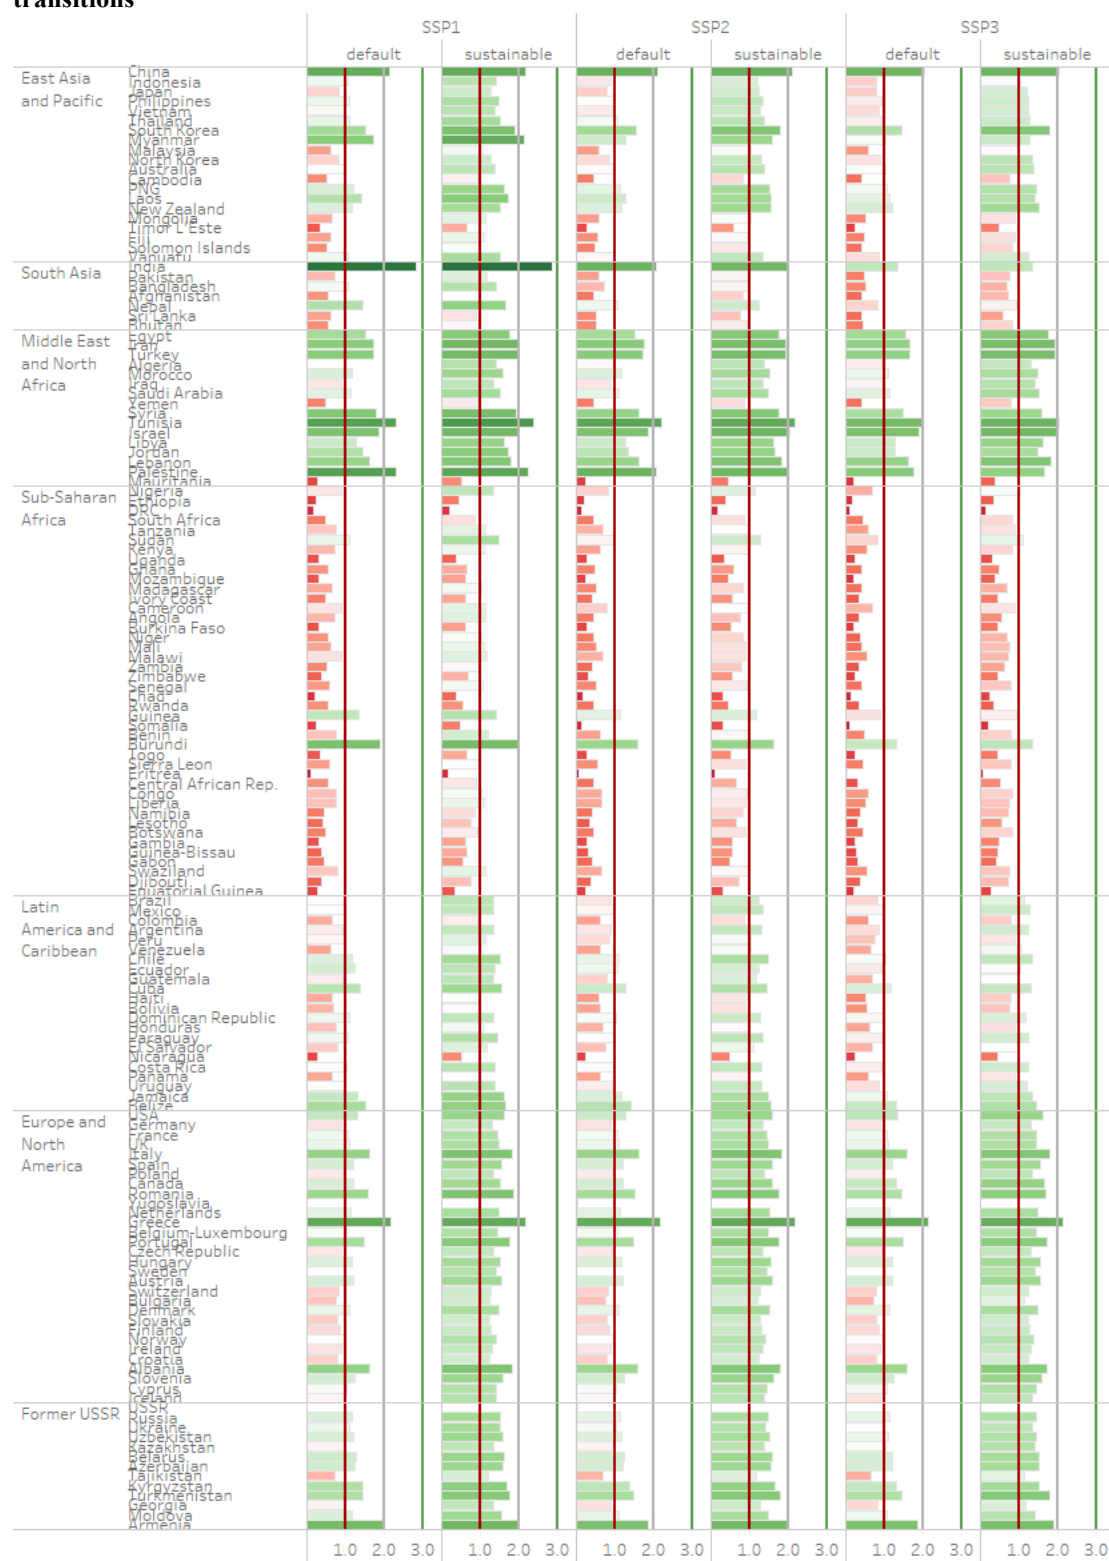

Notes: Countries sorted in descending order by 2010 population. Food availability excludes consumer food waste. 1965-2015 values are taken from FAOSTAT Commodity Balance Sheets<sup>35</sup>, and 2050 values are projections from IMPACT using 3 scenarios (SSP 1–3) using default diets (based on historical trends), and vegetables follow WHO definitions excluding legumes, and starchy roots and tubers. The vertical red, gray, and green lines represents when availability (excl. waste) equals 400, 800, and 1200 g/person/day respectively

Figure S4 All country ratios of fruit & vegetable availability to WHO age-specific recommendations

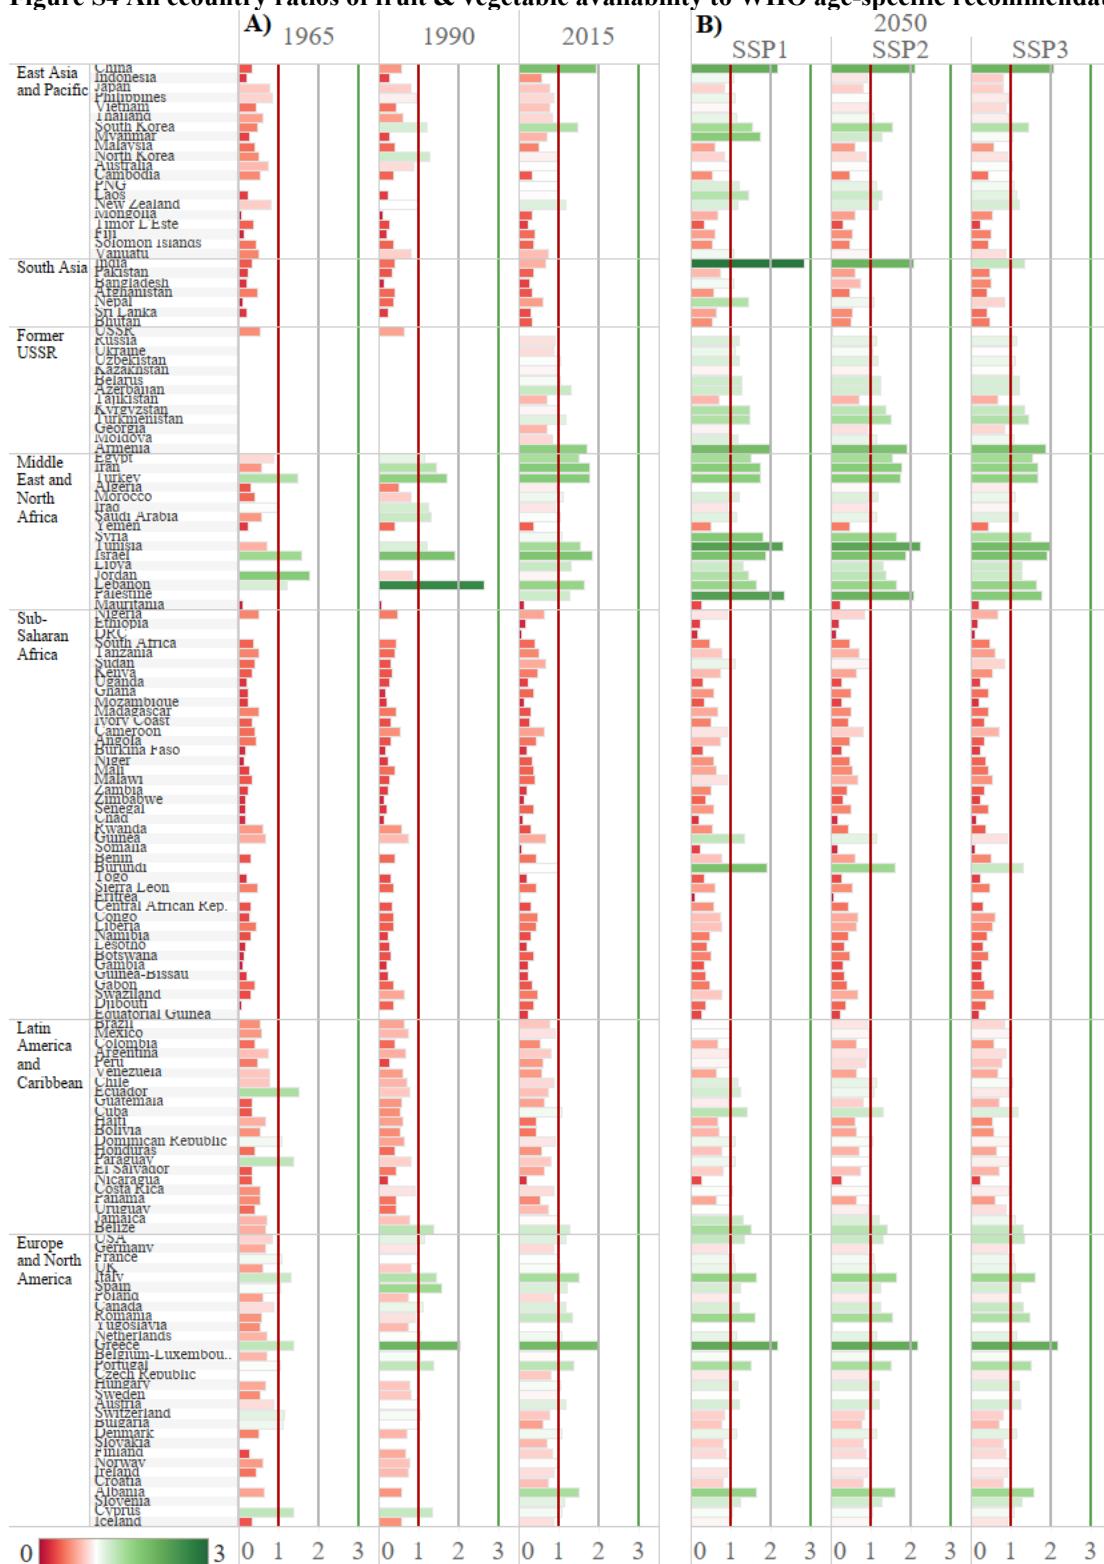

Notes: Countries sorted in descending order by 2010 population. Food availability excludes consumer food waste. 1965 and 1990 values from FAOSTAT Commodity Balance Sheets<sup>27</sup>, and 2015 and 2050 values are projections from IMPACT using 3 scenarios (SSP 1–3) using default diets (based on historical trends), and vegetables follow WHO definitions excluding legumes, and starchy roots and tubers. The vertical red, gray, and green lines represent when availability (excl. waste) equals 1X, 2X, and 3X population weighted average recommended consumption levels respectively



**Figure S5 All country ratios of fruit & vegetable availability to WHO minimum recommendation (400 g/person/day)**

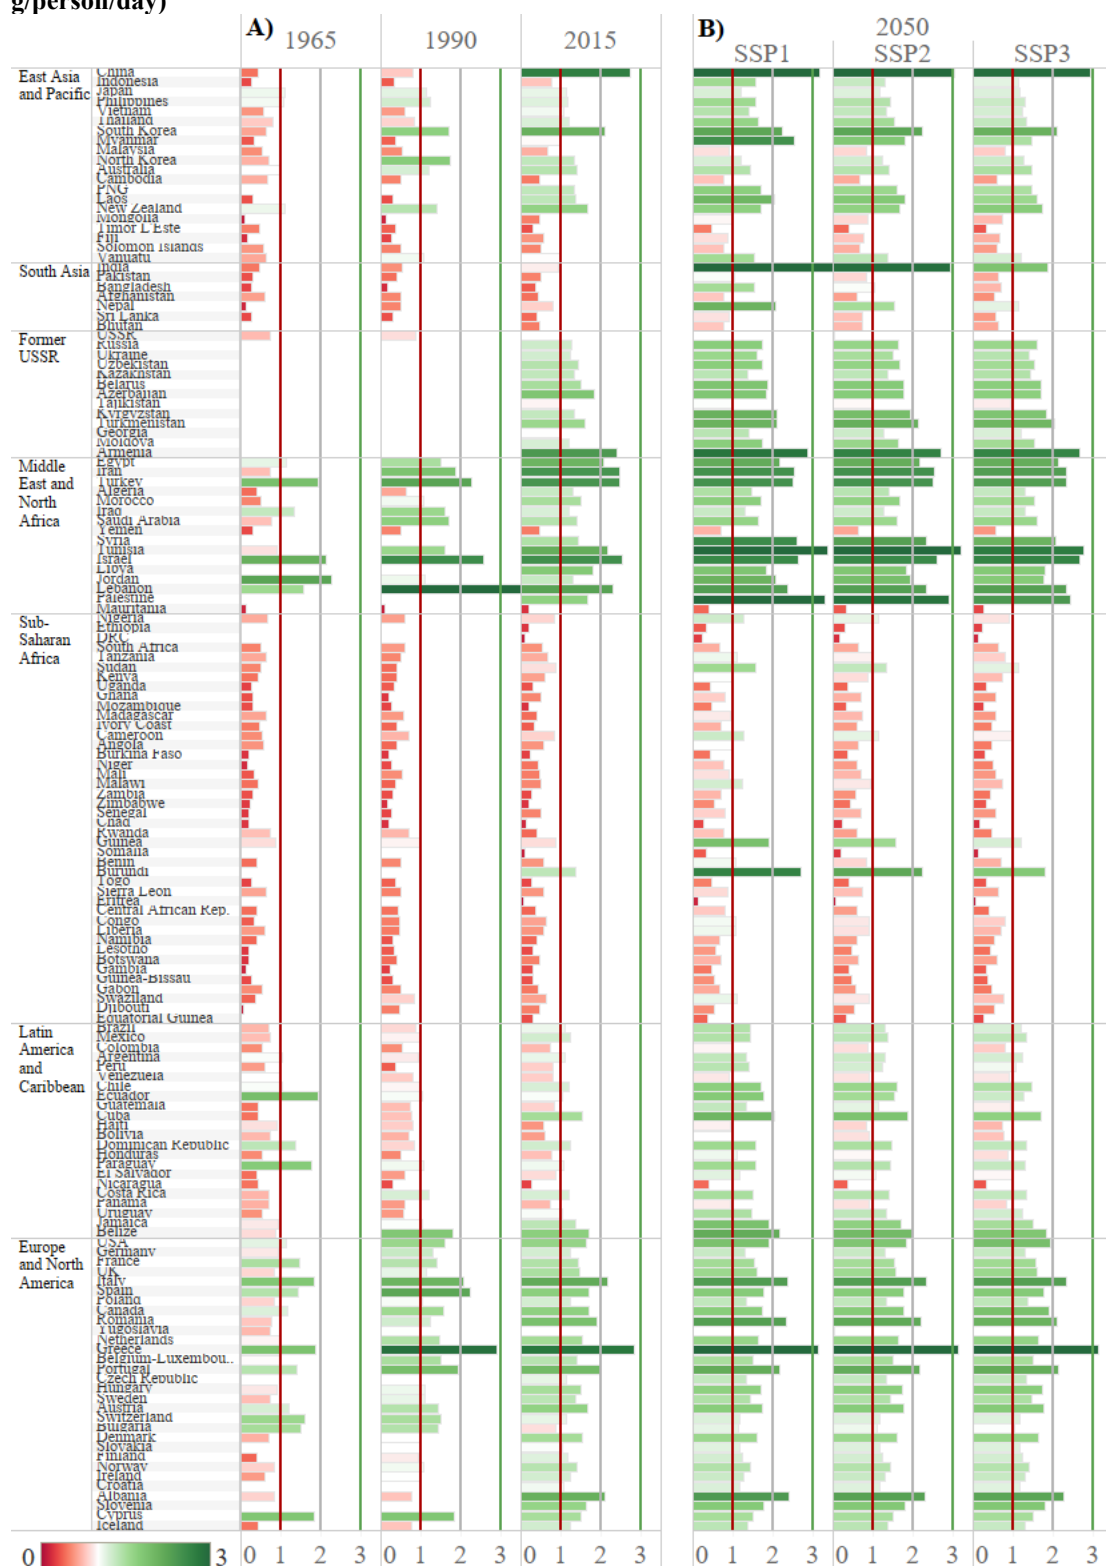

Notes: Countries sorted in descending order by 2010 population. Food availability excludes consumer food waste. 1965 and 1990 values from FAOSTAT Commodity Balance Sheets<sup>27</sup>, and 2015 and 2050 values are projections from IMPACT using 3 scenarios (SSP 1–3) using default diets (based on historical trends), and vegetables follow WHO definitions excluding legumes, and starchy roots and tubers. The vertical red, gray, and green lines represent when availability (excl. waste) equals 1X, 2X, and 3X population weighted average recommended consumption levels respectively

## **Joining NOURISHING Framework and Nuffield Ladder**

To assess the current public policy efforts to encourage healthier diets, and specifically encourage consumption of fruits and vegetables, we used the online database of implemented nutrition policies around the world maintained by the World Cancer Research Fund International.<sup>36</sup> This database categorizes the policies using the NOURISHING framework.<sup>37</sup> According to the latest version of the database (updated October 2018), 764 policies relating to healthy eating and reducing obesity have been implemented around the world. We reviewed these policies for specific references of fruit and vegetables, and identified 164 policies that either identified a quantity of fruits and vegetables, or described an activity specifically promoting increased consumption of fruits and vegetables. In this analysis, we excluded policies that described general healthy eating, without specific mention of fruits or vegetables. Several policies were listed in the database under regions (e.g. EU), and in these circumstances we assumed that all countries in the region adopted the identified policy.

The NOURISHING framework categorizes policies in 10 policy areas across three dimensions of the food system (food environment, food system, and consumer behavior), and suggests that changing behavior will require holistic approaches that target change across all dimensions of the food system. Other studies and analyses of policy effectiveness in the healthy diet space have used the Nuffield Ladder<sup>38</sup>, which characterizes policies by how interventionist they are in altering the choice environment. These studies suggest that policies on the low end (informational) are less likely to lead to significant behavior change. The two frameworks have a lot in common, and we decided to categorize the policies in the NOURISHING Policy database using both frameworks, to better assess the range across the food system, as well as to the degree of force that these interventions have had.

Mapping the policies from the NOURISHING framework to the Nuffield Ladder was not always straightforward, and depending on the perspective of the actors could be defined in different ways. We decided to categorize the NOURISHING policies based on how they would be perceived by the consumer. For example, the first policy in the NOURISHING framework, “Mandatory nutrient lists on packaged food”, could be seen as very prescriptive from the perspective of producers or marketers. However, from the perspective of the consumer this policy is meant to provide information to consumers, and doesn’t further alter their choice infrastructure. Thus we mapped this policy to “Provide Information” in the Nuffield Ladder. The mapping we used in this analysis is provided in Table S7

**Table S7 Mapping the NOURISHING Framework to the Nuffield Ladder**

| <b>Domain</b>                                                                            | <b>Policy Category</b>                                                                            | <b>Policy Option</b>                                           | <b>Nuffield Ladder</b>           |
|------------------------------------------------------------------------------------------|---------------------------------------------------------------------------------------------------|----------------------------------------------------------------|----------------------------------|
| Food<br>Environment                                                                      | Nutrition label standards and regulations on the use of claims and implied claims on foods        | Mandatory nutrient lists on packaged food                      | Provide Information              |
|                                                                                          |                                                                                                   | Trans fats included in mandatory nutrient labels               | Provide Information              |
| Clearly visible “interpretative” labels and warning labels                               |                                                                                                   | Provide Information                                            |                                  |
| On-shelf labelling                                                                       |                                                                                                   | Provide Information                                            |                                  |
| Calorie and nutrient labelling on menus and displays in out-of-home venues               |                                                                                                   | Provide Information                                            |                                  |
| Warning labels on menus and displays in out-of-home venues                               |                                                                                                   | Provide Information                                            |                                  |
| Rules on nutrient claims                                                                 |                                                                                                   | Provide Information                                            |                                  |
| Offer healthy foods and set standards in public institutions and other specific settings | Rules on health claims                                                                            | Provide Information                                            |                                  |
|                                                                                          | Fruit and vegetable initiatives in schools                                                        | Guide choice by changing default                               |                                  |
|                                                                                          | Mandatory standards for food available in schools, including restrictions on unhealthy food       | Guide choice by changing default                               |                                  |
|                                                                                          | Mandatory standards for food available in schools and in their immediate vicinity                 | Guide choice by changing default                               |                                  |
|                                                                                          | Voluntary guidelines for food available in schools                                                | Guide choice by changing default                               |                                  |
|                                                                                          | Bans specific vending machines in schools                                                         | Eliminate Choice                                               |                                  |
|                                                                                          | Standards in social support programs                                                              | Guide choice by changing default                               |                                  |
|                                                                                          | Standards in other specific locations                                                             | Guide choice by changing default                               |                                  |
|                                                                                          | Use economic tools to address food affordability and purchase incentives                          | Health-related food taxes                                      | Guide choice w/ disincentives    |
|                                                                                          |                                                                                                   | Voluntary health-related food taxes                            | Guide choice w/ disincentives    |
| Increasing import tariffs on specified “unhealthy” food                                  |                                                                                                   | Guide choice w/ disincentives                                  |                                  |
| Lowering import tariffs on specified “healthy” food                                      |                                                                                                   | Guide choice w/ incentives                                     |                                  |
| Targeted subsidies for healthy food                                                      |                                                                                                   | Guide choice w/ incentives                                     |                                  |
| Restrict food advertising and other forms of commercial promotion                        |                                                                                                   | Mandatory regulation of broadcast food advertising to children | Guide choice by changing default |
|                                                                                          | Mandatory regulation of food advertising on non-broadcast communications channels                 | Guide choice by changing default                               |                                  |
|                                                                                          | Mandatory regulation of food advertising through any medium                                       | Guide choice by changing default                               |                                  |
|                                                                                          | Mandatory regulation of specific marketing techniques                                             | Guide choice by changing default                               |                                  |
|                                                                                          | Mandatory regulation of marketing of specific food items and beverages                            | Guide choice by changing default                               |                                  |
|                                                                                          | Mandatory regulation of food marketing in schools                                                 | Guide choice by changing default                               |                                  |
|                                                                                          | Mandatory requirement that advertisements must carry a health message or warning                  | Enable Choice                                                  |                                  |
|                                                                                          | Voluntary regulation of food advertising on non-broadcast communications channels                 | Guide choice by changing default                               |                                  |
|                                                                                          | Government engage with industry to develop self-regulation to restrict food marketing to children | Guide choice by changing default                               |                                  |
|                                                                                          | Government support voluntary pledges developed by industry                                        | Guide choice by changing default                               |                                  |
|                                                                                          | Improve the quality of the food supply                                                            | Voluntary reformulation of food products                       | Restrict Choice                  |
|                                                                                          |                                                                                                   | Voluntary commitments to reduce portion sizes                  | Restrict Choice                  |
|                                                                                          |                                                                                                   | Mandatory limits on level of salt in food products             | Restrict Choice                  |
| Mandatory removal of trans fats in food products                                         |                                                                                                   | Restrict Choice                                                |                                  |

|                 |                                                                                                 |                                                                                                   |                                                                |
|-----------------|-------------------------------------------------------------------------------------------------|---------------------------------------------------------------------------------------------------|----------------------------------------------------------------|
|                 |                                                                                                 | Limits on the availability of high-fat meat products                                              | Restrict Choice                                                |
|                 |                                                                                                 | Limits on the availability of high-sugar food products and beverages                              | Restrict Choice                                                |
|                 | Set incentives and rules to create a healthy retail environment                                 | Incentives and rules for stores to locate in under-served neighborhoods                           | Enable Choice                                                  |
|                 |                                                                                                 | Initiatives to increase the availability of healthier food in stores and food service outlets     | Enable Choice                                                  |
|                 |                                                                                                 | Incentives and rules to reduce trans fats in food service outlets                                 | Restrict Choice                                                |
|                 |                                                                                                 | Incentives and rules to offer healthy food options as default in food service outlets             | Guide choice by changing default                               |
|                 |                                                                                                 | Incentives and rules to restrict sugar-sweetened beverage consumption                             | Restrict Choice                                                |
|                 |                                                                                                 | Incentives and rules to reduce salt in food service outlets                                       | Restrict Choice                                                |
|                 |                                                                                                 | Planning restrictions on food outlets                                                             | Restrict Choice                                                |
| Food Supply     | Harness supply chain and actions across sectors to ensure coherence with health                 | Working with food suppliers to provide healthier ingredients                                      | Enable Choice                                                  |
|                 |                                                                                                 | Nutrition standards for public procurement                                                        | Guide choice by changing default                               |
|                 |                                                                                                 | Public procurement through “short” chains                                                         | Guide choice by changing default                               |
|                 |                                                                                                 | Supply chain incentives for food production                                                       | Enable Choice                                                  |
|                 |                                                                                                 | Supporting urban agriculture in health and planning policies                                      | Enable Choice                                                  |
|                 |                                                                                                 | Community food production                                                                         | Enable Choice                                                  |
|                 |                                                                                                 | Governance structures for multi-sectoral/stakeholder engagement                                   | Enable Choice                                                  |
| Behavior Change |                                                                                                 | Inform people about food and nutrition through public awareness                                   | Development and communication of food-based dietary guidelines |
|                 | Development and communication of guidelines for specific food groups                            |                                                                                                   | Provide Information                                            |
|                 | Public awareness, mass media and informational campaigns and social marketing on healthy eating |                                                                                                   | Provide Information                                            |
|                 | Public awareness campaigns specific to fruits and vegetables                                    |                                                                                                   | Provide Information                                            |
|                 | Public awareness campaigns concerning specific unhealthy food and beverages                     |                                                                                                   | Provide Information                                            |
|                 | Public awareness campaigns concerning salt                                                      |                                                                                                   | Provide Information                                            |
|                 | Nutrition advice and counselling in health care settings                                        | Guidelines and programs to provide support in primary care to people who are overweight and obese | Enable Choice                                                  |
|                 |                                                                                                 | Nutrition counselling in primary care                                                             | Enable Choice                                                  |
|                 | Give nutrition education and skills                                                             | Training for health professionals                                                                 | Enable Choice                                                  |
|                 |                                                                                                 | Nutrition education on curricula                                                                  | Enable Choice                                                  |
|                 |                                                                                                 | Community-based nutrition education                                                               | Enable Choice                                                  |
|                 |                                                                                                 | Cooking skills                                                                                    | Enable Choice                                                  |
|                 |                                                                                                 | Initiatives to train school children on growing food                                              | Enable Choice                                                  |
|                 |                                                                                                 | Workplace or community health schemes                                                             | Enable Choice                                                  |
|                 |                                                                                                 | Training for caterers and food service providers                                                  | Enable Choice                                                  |

## References

- 1 Slavin JL, Lloyd B. Health benefits of fruits and vegetables. *Adv Nutr* 2012; **3**: 506–16.
- 2 Harper AE. Evolution of Recommended Dietary Allowances—New Directions? *Annu Rev Nutr* 1987; **7**: 509–37.

- 3 Fischer CG, Garnett T. Plates, pyramids, planet: Developments in national healthy and sustainable dietary guidelines: a state of play assessment. Rome, Italy: FAO, 2016 <http://www.fao.org/3/a-i5640e.pdf>.
- 4 CAN. Guide alimentaire du Bénin. 2015 <http://poledfn.org> (accessed Jan 4, 2019).
- 5 Hwalla N, Nasreddine L, Farhat Jarrar S. Lebanon Food-Based Dietary Guidelines. Beirut, 2013 [http://website.aub.edu.lb/fafs/nfsc/Documents/FBDG English Version.pdf](http://website.aub.edu.lb/fafs/nfsc/Documents/FBDG%20English%20Version.pdf) (accessed Jan 4, 2019).
- 6 Vorster H, Badham J, Venter C. An introduction to the revised food-based dietary guidelines for South Africa. *South African J Clin Nutr* 2013; **26**: S1–164.
- 7 National Health and Medical Research Council. Australian Dietary Guidelines Summary. Canberra, 2013 [www.nhmrc.gov.au/guidelines-publications/n55a](http://www.nhmrc.gov.au/guidelines-publications/n55a) (accessed Jan 4, 2019).
- 8 Wang S-S, Lay S, Yu H-N, Shen S-R. Dietary Guidelines for Chinese Residents (2016): comments and comparisons. *J Zhejiang Univ B* 2016; **17**: 649–56.
- 9 National Institute of Nutrition. Dietary Guidelines for Indians - A Manual. Hyderabad, 2011 <http://ninindia.org/DietaryGuidelinesforNINwebsite.pdf> (accessed Jan 4, 2019).
- 10 Working group on Food-Based Dietary Guidelines for Thai People. Nutrition Flag - Healthy Eating for Thais. Bangkok, 2001 <http://www.fao.org/3/a-as979e.pdf> (accessed Jan 4, 2019).
- 11 Health Canada. Eating Well with Canada Food Guide. Ottawa, 2007 [www.healthcanada.gc.ca/foodguide](http://www.healthcanada.gc.ca/foodguide) (accessed Jan 4, 2019).
- 12 Calañás A, de Cos AI, López-Nomdedeu C, Ortega R, Palacios N, Vázquez C. Come sano y muévete: decisiones saludables. Madrid, 2008 [http://www.aecosan.msssi.gob.es/AECOSAN/docs/documentos/nutricion/educanaos/come\\_sano\\_muévete.pdf](http://www.aecosan.msssi.gob.es/AECOSAN/docs/documentos/nutricion/educanaos/come_sano_muévete.pdf) (accessed Jan 4, 2019).
- 13 USHHS, USDA. 2015-2020 Dietary Guidelines for Americans. Washington, DC, 2015 <http://health.gov/dietaryguidelines/2015/guidelines/>. (accessed Jan 4, 2019).
- 14 Ministerio de Salud de la Nación. Guías alimentarias para la población Argentina. Buenos Aires, 2016 [http://www.msal.gob.ar/images/stories/bes/graficos/0000000817cnt-2016-04\\_Guia\\_Alimentaria\\_completa\\_web.pdf](http://www.msal.gob.ar/images/stories/bes/graficos/0000000817cnt-2016-04_Guia_Alimentaria_completa_web.pdf) (accessed Jan 4, 2019).
- 15 Bolivia Ministerio de Salud. Bases técnicas de las guías alimentarias para la población boliviana. La Paz, 2013 <http://www.sns.gob.bo> (accessed Jan 4, 2019).
- 16 Academia Nacional de Medicina Mexico. Guías alimentarias y de actividad física. Mexico, DF, 2015 <http://guiasalimentacionyactividadfisica.org.mx/wp-content/uploads/2015/10/Guias-alimentarias-y-de-actividad-fisica.pdf> (accessed Jan 4, 2019).
- 17 WHO. Healthy diet. 2018. <https://www.who.int/news-room/fact-sheets/detail/healthy-diet> (accessed Jan 7, 2019).
- 18 Lock K, Pomerleau J, Causer L, Mckee M. Low fruit and vegetable consumption. In: Ezzati M, Lopez AD, Rodgers A, Murray CJL, eds. Comparative Quantification of Health Risks Global and Regional Burden of Disease Attributable to Selected Major Risk Factors. Geneva: WHO, 2004: 597–728.
- 19 Willett W, Rockström J, Loken B, *et al.* Food in the Anthropocene: the EAT–Lancet Commission on healthy diets from sustainable food systems. *Lancet* 2019; **6736**: 3–49.
- 20 Hasegawa T, Fujimori S, Havlík P, *et al.* Risk of increased food insecurity under stringent global climate change mitigation policy. *Nat Clim Chang* 2018; **8**: 699–703.
- 21 Stehfest E, van Zeist W-J, Valin H, *et al.* Key determinants of global land-use futures. *Nat Commun.*
- 22 Delgado C, Rosegrant M, Steinfeld H, Ehui S, Courbois C. Livestock to 2020: The Next Food Revolution. Washington D.C., 1999

- <http://books.google.com/books?hl=en&lr=&id=MqTT1hsfcy0C&oi=fnd&pg=PR7&dq=Livestock+to+2020+The+Next+Food+Revolution&ots=kxyaTh11r&sig=tGP7XomQezUhutvZZhqBH24s6b4>.
- 23 Robinson S, Mason-D’Croz D, Islam S, *et al*. The International Model for Policy Analysis of Agricultural Commodities and Trade (IMPACT): Model Description for Version 3. Washington D.C., 2015 DOI:10.2139/ssrn.2741234.
  - 24 Nelson GC, Bogard J, Lividini K, *et al*. Income Growth and Climate Change Effects on Global Nutrition Security to Mid-Century. *Nat Sustain* 2018; **1**. DOI:10.1038/s41893-018-0192-z.
  - 25 Mason-D’Croz D, Robinson S, Dunston S, Sulser TB. A Bayesian methodology for building consistent datasets for structural modeling. Applying information theory to disparate and sparse agricultural datasets for IMPACT. In: 21st Annual Conference on Global Economic Analysis. Cartagena, Colombia: GTAP, 2018: 24.
  - 26 Springmann M, Mason-D’Croz D, Robinson S, *et al*. Global and regional health effects of future food production under climate change: a modelling study. *Lancet* 2016; **387**: 1937–46.
  - 27 Springmann M, Wiebe K, Mason-D’Croz D, Sulser TB, Rayner M, Scarborough P. Health and nutritional aspects of sustainable diet strategies and their association with environmental impacts: a global modelling analysis with country-level detail. *Lancet Planet Heal* 2018; **2**: e451–61.
  - 28 Gustavsson J, Cederberg C, Sonesson U, Emanuelsson A. The methodology of the FAO study: ‘Global Food Losses and Food Waste - extent, causes and prevention’. The Swedish Institute for Food and Biotechnology (SIK), 2013 DOI:10.1029/2006JD008332.
  - 29 O’Neill BC, Kriegler E, Ebi KL, *et al*. The roads ahead: Narratives for shared socioeconomic pathways describing world futures in the 21st century. *Glob Environ Chang* 2017; **42**: 169–80.
  - 30 Riahi K, van Vuuren DP, Kriegler E, *et al*. The Shared Socioeconomic Pathways and their energy, land use, and greenhouse gas emissions implications: An overview. *Glob Environ Chang* 2017; **42**: 153–68.
  - 31 KC S, Lutz W. The human core of the shared socioeconomic pathways: Population scenarios by age, sex and level of education for all countries to 2100. *Glob Environ Chang* 2017; **42**: 181–92.
  - 32 IIASA. SSP Public Database. 2018. <https://tntcat.iiasa.ac.at/SspV2Preview>.
  - 33 Rosegrant MW, Sulser TB, Mason-D’Croz D, *et al*. Quantitative foresight modeling to inform the CGIAR research portfolio. 2017 <http://ebrary.ifpri.org/cdm/singleitem/collection/p15738coll2/id/131144>.
  - 34 Mason-D’Croz D, Sulser TB, Wiebe K, *et al*. Agricultural investments and hunger in Africa modeling potential contributions to SDG2 – Zero Hunger. *World Dev* 2019; **116**: 38–53.
  - 35 FAO. FAOSTAT Commodity Balances. 2018. <http://www.fao.org/faostat/en/#data/BC> (accessed Sept 4, 2018).
  - 36 World Cancer Research Fund International. NOURISHING Policy Database. 2018. <https://www.wcrf.org/int/policy/nourishing-database> (accessed Dec 1, 2018).
  - 37 Hawkes C, Jewell J, Allen K. A food policy package for healthy diets and the prevention of obesity and diet-related non-communicable diseases: the NOURISHING framework. *Obes Rev* 2013; **14**: 159–68.
  - 38 Nuffield Council on Bioethics. Policy process and practice. In: Public health: ethical issues. London, 2007: 29–47.
